# Supplementary material for: Comparative transcriptome provides molecular insight into defense-associated mechanisms against spider mite in resistant and susceptible common bean cultivars
Source: PubMed Central journal article supplement (PMC6999899; doi:10.1371/journal.pone.0228680), 2020-02-04

# PLOS ONE

## Comparative transcriptome provides molecular insight into defense-associated mechanisms against spider mite in resistant and susceptible common bean cultivars --Manuscript Draft--

|                                                                                                                                                                                                                                                                                                                             |                                                                                                                                                                                                                                                                                                                                                                                                                                                                                                                                                                                                                                                                                                                                                                                                                                                                                                                                                                                                                                                                                                                                                                                                                                                                                                                                                                                                                                                                                                           |
|-----------------------------------------------------------------------------------------------------------------------------------------------------------------------------------------------------------------------------------------------------------------------------------------------------------------------------|-----------------------------------------------------------------------------------------------------------------------------------------------------------------------------------------------------------------------------------------------------------------------------------------------------------------------------------------------------------------------------------------------------------------------------------------------------------------------------------------------------------------------------------------------------------------------------------------------------------------------------------------------------------------------------------------------------------------------------------------------------------------------------------------------------------------------------------------------------------------------------------------------------------------------------------------------------------------------------------------------------------------------------------------------------------------------------------------------------------------------------------------------------------------------------------------------------------------------------------------------------------------------------------------------------------------------------------------------------------------------------------------------------------------------------------------------------------------------------------------------------------|
| <b>Manuscript Number:</b>                                                                                                                                                                                                                                                                                                   | PONE-D-19-29263                                                                                                                                                                                                                                                                                                                                                                                                                                                                                                                                                                                                                                                                                                                                                                                                                                                                                                                                                                                                                                                                                                                                                                                                                                                                                                                                                                                                                                                                                           |
| <b>Article Type:</b>                                                                                                                                                                                                                                                                                                        | Research Article                                                                                                                                                                                                                                                                                                                                                                                                                                                                                                                                                                                                                                                                                                                                                                                                                                                                                                                                                                                                                                                                                                                                                                                                                                                                                                                                                                                                                                                                                          |
| <b>Full Title:</b>                                                                                                                                                                                                                                                                                                          | Comparative transcriptome provides molecular insight into defense-associated mechanisms against spider mite in resistant and susceptible common bean cultivars                                                                                                                                                                                                                                                                                                                                                                                                                                                                                                                                                                                                                                                                                                                                                                                                                                                                                                                                                                                                                                                                                                                                                                                                                                                                                                                                            |
| <b>Short Title:</b>                                                                                                                                                                                                                                                                                                         | Transcriptome analysis of common bean attacked by Spider mite                                                                                                                                                                                                                                                                                                                                                                                                                                                                                                                                                                                                                                                                                                                                                                                                                                                                                                                                                                                                                                                                                                                                                                                                                                                                                                                                                                                                                                             |
| <b>Corresponding Author:</b>                                                                                                                                                                                                                                                                                                | Aboozar Soorni<br>Isfahan University of Technology<br>Isfahan, IRAN, ISLAMIC REPUBLIC OF                                                                                                                                                                                                                                                                                                                                                                                                                                                                                                                                                                                                                                                                                                                                                                                                                                                                                                                                                                                                                                                                                                                                                                                                                                                                                                                                                                                                                  |
| <b>Keywords:</b>                                                                                                                                                                                                                                                                                                            |                                                                                                                                                                                                                                                                                                                                                                                                                                                                                                                                                                                                                                                                                                                                                                                                                                                                                                                                                                                                                                                                                                                                                                                                                                                                                                                                                                                                                                                                                                           |
| <b>Abstract:</b>                                                                                                                                                                                                                                                                                                            | Common bean ( <i>Phaseolus vulgaris</i> L.) is a major source of proteins and one of the most important edible foods for more than three hundred million people in the world. The common bean plants are frequently attacked by Spider mite ( <i>Tetranychus urticae</i> Koch), leading to a significant decrease in plant growth and economic performance. The use of resistant cultivars and the identification of the genes involved in plant-mite resistance are practical solutions to this problem. Hence, a comprehensive study of the molecular interactions between resistant and susceptible common bean cultivars and spider mite can shed light into the understanding of mechanisms and biological pathways of resistance. In this study, one resistant (Naz) and one susceptible (Akhtar) cultivars were selected for a transcriptome comparison at different time points (0, 1 and 5 days) after spider mite feeding. The comparison of cultivars in different time points revealed several key genes, which showed a change increase in transcript abundance via spider mite infestation. These included genes involved in flavonoid biosynthesis process; a conserved MYB-bHLH-WD40 (MBW) regulatory complex; transcription factors (TFs) TT2, TT8, TCP, Cys2/His2-type and C2H2-type zinc finger proteins; the ethylene response factors (ERFs) ERF1 and ERF9; genes related to metabolism of auxin and jasmonic acid (JA); pathogenesis-related (PR) proteins and heat shock proteins. |
| <b>Order of Authors:</b>                                                                                                                                                                                                                                                                                                    | Abdul Hadi Hoseinzadeh<br>Aboozar Soorni<br>Marie Shoorooei<br>Masoud Torkzadeh Mahani<br>Reza Maali Amiri<br>Hossein Allahyari<br>Rahmat Mohammadi                                                                                                                                                                                                                                                                                                                                                                                                                                                                                                                                                                                                                                                                                                                                                                                                                                                                                                                                                                                                                                                                                                                                                                                                                                                                                                                                                       |
| <b>Additional Information:</b>                                                                                                                                                                                                                                                                                              |                                                                                                                                                                                                                                                                                                                                                                                                                                                                                                                                                                                                                                                                                                                                                                                                                                                                                                                                                                                                                                                                                                                                                                                                                                                                                                                                                                                                                                                                                                           |
| <b>Question</b>                                                                                                                                                                                                                                                                                                             | <b>Response</b>                                                                                                                                                                                                                                                                                                                                                                                                                                                                                                                                                                                                                                                                                                                                                                                                                                                                                                                                                                                                                                                                                                                                                                                                                                                                                                                                                                                                                                                                                           |
| <b>Financial Disclosure</b><br><br>Enter a financial disclosure statement that describes the sources of funding for the work included in this submission. Review the <a href="#">submission guidelines</a> for detailed requirements. View published research articles from <a href="#">PLOS ONE</a> for specific examples. | The authors received no specific funding for this work.                                                                                                                                                                                                                                                                                                                                                                                                                                                                                                                                                                                                                                                                                                                                                                                                                                                                                                                                                                                                                                                                                                                                                                                                                                                                                                                                                                                                                                                   |

This statement is required for submission and **will appear in the published article** if the submission is accepted. Please make sure it is accurate.

#### Unfunded studies

Enter: *The author(s) received no specific funding for this work.*

#### Funded studies

Enter a statement with the following details:

- Initials of the authors who received each award
- Grant numbers awarded to each author
- The full name of each funder
- URL of each funder website
- Did the sponsors or funders play any role in the study design, data collection and analysis, decision to publish, or preparation of the manuscript?
- **NO** - Include this sentence at the end of your statement: *The funders had no role in study design, data collection and analysis, decision to publish, or preparation of the manuscript.*
- **YES** - Specify the role(s) played.

\* typeset

#### Competing Interests

Use the instructions below to enter a competing interest statement for this submission. On behalf of all authors, disclose any [competing interests](#) that could be perceived to bias this work—acknowledging all financial support and any other relevant financial or non-financial competing interests.

This statement **will appear in the published article** if the submission is accepted. Please make sure it is accurate. View published research articles from [PLOS ONE](#) for specific examples.

The authors have declared that no competing interests exist.

**NO authors have competing interests**

Enter: *The authors have declared that no competing interests exist.*

**Authors with competing interests**

Enter competing interest details beginning with this statement:

*I have read the journal's policy and the authors of this manuscript have the following competing interests: [insert competing interests here]*

\* typeset

**Ethics Statement**

N/A

Enter an ethics statement for this submission. This statement is required if the study involved:

- Human participants
- Human specimens or tissue
- Vertebrate animals or cephalopods
- Vertebrate embryos or tissues
- Field research

Write "N/A" if the submission does not require an ethics statement.

General guidance is provided below. Consult the [submission guidelines](#) for detailed instructions. **Make sure that all information entered here is included in the Methods section of the manuscript.**

**Format for specific study types**

**Human Subject Research (involving human participants and/or tissue)**

- Give the name of the institutional review board or ethics committee that approved the study
- Include the approval number and/or a statement indicating approval of this research
- Indicate the form of consent obtained (written/oral) or the reason that consent was not obtained (e.g. the data were analyzed anonymously)

**Animal Research (involving vertebrate animals, embryos or tissues)**

- Provide the name of the Institutional Animal Care and Use Committee (IACUC) or other relevant ethics board that reviewed the study protocol, and indicate whether they approved this research or granted a formal waiver of ethical approval
- Include an approval number if one was obtained
- If the study involved *non-human primates*, add *additional details* about animal welfare and steps taken to ameliorate suffering
- If anesthesia, euthanasia, or any kind of animal sacrifice is part of the study, include briefly which substances and/or methods were applied

**Field Research**

Include the following details if this study involves the collection of plant, animal, or other materials from a natural setting:

- Field permit number
- Name of the institution or relevant body that granted permission

**Data Availability**

Authors are required to make all data underlying the findings described fully available, without restriction, and from the time of publication. PLOS allows rare exceptions to address legal and ethical concerns. See the [PLOS Data Policy](#) and [FAQ](#) for detailed information.

Yes - all data are fully available without restriction

A Data Availability Statement describing where the data can be found is required at submission. Your answers to this question constitute the Data Availability Statement and **will be published in the article**, if accepted.

**Important:** Stating 'data available on request from the author' is not sufficient. If your data are only available upon request, select 'No' for the first question and explain your exceptional situation in the text box.

Do the authors confirm that all data underlying the findings described in their manuscript are fully available without restriction?

**Describe where the data may be found in full sentences. If you are copying our sample text, replace any instances of XXX with the appropriate details.**

- If the data are **held or will be held in a public repository**, include URLs, accession numbers or DOIs. If this information will only be available after acceptance, indicate this by ticking the box below. For example: *All XXX files are available from the XXX database (accession number(s) XXX, XXX).*
- If the data are all contained **within the manuscript and/or Supporting Information files**, enter the following: *All relevant data are within the manuscript and its Supporting Information files.*
- If neither of these applies but you are able to provide **details of access elsewhere**, with or without limitations, please do so. For example:

*Data cannot be shared publicly because of [XXX]. Data are available from the XXX Institutional Data Access / Ethics Committee (contact via XXX) for researchers who meet the criteria for access to confidential data.*

*The data underlying the results presented in the study are available from (include the name of the third party*

All RNA-Seq data were deposited to the NCBI sequence read archive (SRA) under the project PRJNA482175.

*and contact information or URL).*

- This text is appropriate if the data are owned by a third party and authors do not have permission to share the data.

\* typeset

Additional data availability information:

1 **Comparative transcriptome provides molecular insight into defense-**  
2 **associated mechanisms against spider mite in resistant and susceptible**  
3 **common bean cultivars**

4 Abdul Hadi Hoseinzadeh<sup>1\*</sup>¶, Aboozar Soorni<sup>2\*</sup>¶, Marie Shoorooei<sup>1</sup>, Masoud Torkzadeh Mahani<sup>3</sup>,  
5 Reza Maali Amiri<sup>1</sup>, Hossein Allahyari<sup>4</sup> and Rahmat Mohammadi<sup>1</sup>

6 <sup>1</sup>Department of Agronomy and Plant Breeding, Faculty of Agriculture, University of Tehran,  
7 Karaj, Iran

8 <sup>2</sup>Department of Biotechnology, College of Agriculture, Isfahan University of Technology,  
9 Isfahan 84156-8311, Iran

10 <sup>3</sup>Department of Biotechnology, Institute of Science, High Technology and Environmental  
11 Science, Graduate University of Advanced Technology, Kerman, Iran

12 <sup>4</sup>Department of Plant Protection, Faculty of Agriculture, University of Tehran, Karaj, Iran

13 **\*Corresponding author.**

14 Abdul Hadi Hoseinzadeh: ahzadeh@ut.ac.ir

15 Aboozar Soorni: soorni@cc.iut.ac.ir

16

17

18

19 ¶These authors contributed equally to this work

20

21

22

23

24

25

26

27

28

29

30

31

32

33

34

35

36

37

38 **Abstract**

39 Common bean (*Phaseolus vulgaris* L.) is a major source of proteins and one of the most  
40 important edible foods for more than three hundred million people in the world. The common  
41 bean plants are frequently attacked by Spider mite (*Tetranychus urticae* Koch), leading to a  
42 significant decrease in plant growth and economic performance. The use of resistant cultivars  
43 and the identification of the genes involved in plant-mite resistance are practical solutions to this  
44 problem. Hence, a comprehensive study of the molecular interactions between resistant and  
45 susceptible common bean cultivars and spider mite can shed light into the understanding of  
46 mechanisms and biological pathways of resistance. In this study, one resistant (*Naz*) and one  
47 susceptible (*Akhtar*) cultivars were selected for a transcriptome comparison at different time  
48 points (0, 1 and 5 days) after spider mite feeding. The comparison of cultivars in different time  
49 points revealed several key genes, which showed a change increase in transcript abundance via  
50 spider mite infestation. These included genes involved in flavonoid biosynthesis process; a  
51 conserved *MYB-bHLH-WD40* (MBW) regulatory complex; transcription factors (TFs) TT2, TT8,  
52 TCP, Cys2/His2-type and C2H2-type zinc finger proteins; the ethylene response factors (ERFs)  
53 ERF1 and ERF9; genes related to metabolism of auxin and jasmonic acid (JA); pathogenesis-  
54 related (PR) proteins and heat shock proteins.

55  
56 Keywords: Common bean, Spider mite, Transcriptome, Defense mechanisms, Biological  
57 pathways.

58

59

60

61

62

63



## 64 **Introduction**

65 Common bean (*Phaseolus vulgaris* L.), is one of the most important edible foods in the world  
66 which provides about 50% of the grain legumes for direct human consumption [1-3]. In addition,  
67 it is an inexpensive healthy food due to having the richest sources of proteins (20-25%),  
68 micronutrients and calories [2]. Common bean is widely distributed around the world. In Asia,  
69 most collections exist in India [4], and Iran [5]. Notably, over the last 10 years, the production of  
70 common bean has increased ~33% in Asia [2]. Because of high nutrient content and commercial  
71 potential, common bean holds great promise for fighting hunger and increasing income. Low  
72 yield of this crop is attributed to pest attack, weak soil fertility, drought and salinity, and poor  
73 agronomic practices [6]. According to the records, *Tetranychus urticae* Koch (TSSM) is the most  
74 widespread and the most polyphagous herbivores mites which feed on cell contents of common  
75 bean and causes serious substantial economic losses (up to 100% yield losses) in fields and  
76 greenhouses [7, 8]. The TSSM damages plant cells by its stylet that pierces the leaf either in  
77 between epidermal pavement cells or through a stomatal opening, suck-out their contents and  
78 forms the chlorotic lesions at the feeding sites [8, 9]. In recent years, it has become evident that  
79 insect-resistant crops have brought great benefits, not only in terms of economic, but also  
80 because of the reduction of pesticides use and keeping a safe environment. The development of  
81 new cultivars is being established as one of the most appropriate methods and the main objective  
82 of plant breeding programs for resistance to TSSM [10, 11]. However, lacking information on  
83 how plant and mite interact with each other emphasizes the importance of a comprehensive study  
84 of the molecular interactions between common bean and *T. urticae* to understand the  
85 mechanisms and potential biological pathways of common bean resistance. Although RNA-Seq  
86 has been used to study the expression profiles of stress response genes in model and non-model  
87 plants, but there has not been any study of common bean transcriptome changes due to spider  
88 mite feeding. In this study we used RNA-seq  analysis to detect differences in gene expression  
89 between two cultivars of *P. vulgaris* (susceptible and resistant), and specify effective genes and  
90 pathways in response to *T. urticae* infestation. Such information could lead to identify resistant  
91 mechanisms and genes in common bean and improve the breeding efforts by identifying  
92 molecular markers to incorporate resistance into commercial bean varieties.

93

## 94 **Materials and Methods**

### 95 **Plants and insect infestation**

96 According to our previous study [12], two cultivars, including *Akhtar* and *Naz* were selected as  
97 susceptible and resistant cultivars to *T. urticae*, respectively. The experiment was conducted  
98 using a factorial experiment based on completely randomized design with three replicates in  
99 greenhouse condition ( $28 \pm 3^\circ\text{C}$  temperature, 40-50% relative humidity, photoperiod 16h light  
100 and 8h darkness). In six-leaf stage of Meier [13], 45 same-aged adult female mites were placed  
101 on sixth leaf of cultivars. The leaves were collected after 0, 1 and 5 days of infestation. Treated  
102 leaves were frozen in liquid nitrogen and kept at  $-80^\circ\text{C}$  until they were used for RNA  
103 extraction.

### 104 **RNA isolation and transcriptome sequencing**

105 Total RNA was extracted from two biological replicates, which each were pooled samples from  
106 at least three plants using TRIzol<sup>®</sup> Reagent (Invitrogen) as described by the manufacturer's  
107 protocol, and then treated with RNase-free DNaseI (Invitrogen). Nanodrop<sup>™</sup> 2000  
108 spectrophotometer, agarose gel electrophoresis and Bioanalyzer 2100 (Agilent) were used to  
109 check and confirm quantity and quality of RNAs. All RNAs were sent to Beijing Genomic  
110 Institute (BGI) in China for library preparation and transcriptome sequencing using the Illumina  
111 HiSeq 2500 platform to generate Paired-end (2×150 bp) reads.

### 112 **Reads preprocessing and differentially expression analysis**

113 ~~The raw reads were downloaded from BGI institute web site in Fastq format~~ and then deposited  
114 in the NCBI SRA database under the project PRJNA482175. All RNA-Seq data were subjected  
115 to quality control (QC) analysis using Trimmomatic software [14] to drop out low quality reads,  
116 adapters and other Illumina-specific sequences, minimum length 50 bp and minimum quality 30  
117 determined as quality thresholds. Before and after filtering, the quality of the raw sequences was  
118 assessed with FastQC (<https://www.bioinformatics.babraham.ac.uk/projects/fastqc/>). Clean reads  
119 were mapped to the *P. vulgaris* [15] (<https://phytozome.jgi.doe.gov>) and *T. urticae* [16] reference  
120 genomes V. 2.0 via RNA-seq aligner STAR software [17] requiring at least 90% of the read  
121 sequence to match with at least 95% identity. The STAR-resultant *.bam* files were used to

122 estimate the abundance of mapped reads, differential expression analyses, and visualization of  
 123 analyses results using Cufflinks [18] package coupled with CummeRbund [19]. Cufflinks was  
 124 used to calculate FPKM values and differential expression analysis was done with Cuffdiff. The  
 125 analysis focused on genes with statistically significant difference in expression levels between  
 126 times and cultivars. The genes were considered significantly differentially expressed if false  
 127 discovery rate (FDR, the adjusted P value) was <0.01 and Log2 FPKM (fold change) was  $\geq 1.0$ .

## 128 GO Enrichment Analysis

129 The functions of the DEGs were characterized using AgriGO's Singular Enrichment Analysis  
 130 (SEA) module to identify the enriched Gene Ontology terms  
 131 (<http://bioinfo.cau.edu.cn/agriGO/analysis.php>) with the agriGO database [20]. The enrichment  
 132 analysis was performed at significance level of 0.05.

## 133 Quantitative real-time PCR validation

134 To validate candidate differentially expressed genes (DEGs), qRT-PCR was performed for six  
 135 DEGs and *Actin 11* as a reference gene with three replicates. Primers were designed by Primer  
 136 3.0 [21] (Table 1), and cDNAs were synthesized by using TaKaRa cDNA Synthesis Kit  
 137 (TaKaRa, Dalian, China) according to the manufacturer's instructions. The 20  $\mu$ L qRT-PCR  
 138 solutions contained EvaGreen Master Mix (Solis Biodyne, 5x), 0.3  $\mu$ L forward and 0.3  $\mu$ L  
 139 reverse primers, and 30 ng of cDNA template. qRT-PCR reactions (95  $^{\circ}$ C, 3 min; 95  $^{\circ}$ C, 5 s;  
 140 60  $^{\circ}$ C, 34 s; 40 cycles) were carried out on a Bio-Rad iQ5 Optical System (Bio-Rad Laboratories,  
 141 CA, USA). Finally, relative gene expression was calculated using  $2^{-\Delta\Delta C_t}$  formula and REST  
 142 software [22].

143 **Table 1. Description of the candidate genes and primer sequences for qRT-PCR**  
 144 **assay efficiencies.**

| Functional annotation                    | Gene ID              | Forward primer             | Reverse prime             |
|------------------------------------------|----------------------|----------------------------|---------------------------|
| Pathogenesis-related protein             | Phvul.004G155<br>500 | TGGGATACAGCTACAGCA<br>TCGT | TCTTCATTGGGTGGAGC<br>ATCT |
| WRKY transcription factor 50             | Phvul.009G080<br>000 | GTCGCTGAGATCGGAGAA<br>TC   | GCAAATCCAGCTTTGACC<br>AT  |
| Heat shock protein (Molecular chaperone) | Phvul.008G011<br>400 | CTTCAACACCAACGCCAT<br>G    | GCTCAAGCTCCGAGTAGG        |

|                                                   |                      |                          |                           |
|---------------------------------------------------|----------------------|--------------------------|---------------------------|
| Leucine Rich Repeat                               | Phvul.008G044<br>600 | CTTGACTATGAGCTTGTC<br>CC | TGCTTTCTCTGTAAGGTGT<br>CC |
| MYB113                                            | Phvul.008G038<br>200 | GTCGCTGAGATCGGAGAA<br>TC | GCAAATCCAGCTTTGACC<br>AT  |
| Xyloglucan<br>endotransglucosylase/hydro<br>lases | Phvul.005G111<br>300 | AGTTCGACGAGCTGTTCCA<br>G | ACGTTGGTCTGCACGCTG<br>TA  |

145

## 146 Results and Discussion

### 147 Quality control and mapping statistics

148 A total of 12 RNA libraries were sequenced with the ~~sequencing depth~~ ranging from 26.8–30.2  
 149 million paired-end reads (Table 2). Approximately 70-73% of reads passed the quality control  
 150 and an 84.58-90.30% of the clean reads were mapped to unique location in the common bean  
 151 reference genome. Alignment of clean reads to *T. urticae* reference genome was also carried out  
 152 to determine whether a significant mite RNA contamination exists in our datasets. Assessment of  
 153 quality of mRNA-seq data revealed less than 0.1% mapping, indicating a strong enrichment of  
 154 genes specific for *P. vulgaris* in all samples.

155 **Table 2. Summary of sample information and transcriptome sequencing output statistics**  
 156 **for the RNA-seq libraries**

| Cultivars                      | Replicate   | Time points | Reads before<br>quality<br>control | Reads after<br>quality<br>control | Removing<br>percent |
|--------------------------------|-------------|-------------|------------------------------------|-----------------------------------|---------------------|
| <i>Akhtar</i><br>(susceptible) | Replicate 1 | Control     | 30261354                           | 21020563                          | 30.54               |
|                                |             | 1 Day       | 28834008                           | 20871380                          | 27.62               |
|                                |             | 5 Day       | 26832585                           | 19131482                          | 28.70               |
|                                | Replicate 2 | Control     | 31261254                           | 22020354                          | 29.56               |
|                                |             | 1 Day       | 27836208                           | 20971682                          | 24.66               |
|                                |             | 5 Day       | 26632382                           | 19231180                          | 27.79               |
| <i>Naz</i><br>(resistant)      | Replicate 1 | Control     | 30593227                           | 22305624                          | 27.09               |
|                                |             | 1 Day       | 27677349                           | 19152514                          | 30.80               |
|                                |             | 5 Day       | 29214322                           | 21461892                          | 26.54               |
|                                | Replicate 2 | Control     | 30243118                           | 22212456                          | 26.55               |
|                                |             | 1 Day       | 28123454                           | 19252314                          | 31.54               |
|                                |             | 5 Day       | 28876322                           | 21863542                          | 24.29               |

157

### 158 Distribution of differentially expressed genes (DEGs)

159 Differentially expressed genes analysis was performed for the pairwise comparisons of twelve  
160 libraries. The largest differences in expression occurred among three time points of resistant  
161 cultivar. When comparing the different time points for resistant cultivar, 274 differentially  
162 expressed genes were identified (Table S1), almost the same number of DEGs for susceptible  
163 cultivar (270 DEGs, Table S2). The number of up-regulated genes was higher than down-  
164 regulated genes in all different time point comparisons in both cultivars. To gain a better  
165 understanding, the overlap differentially expressed patterns of DEGs were analyzed between  
166 cultivars in each time point and across time points in each cultivars using Venn diagram. The  
167 comparison of cultivars in each time points revealed 48, 65 and 81 up-regulated genes along  
168 with 46, 59, 68 down-regulated genes in resistant cultivar for control samples and these infested  
169 at 1 and 5 days post-feeding, respectively (Fig 1, Table S3-5). The number of DEGs showed a  
170 rising trend with the extension of infestation time, So that the smallest and largest differences  
171 were observed between resistant and susceptible plants at first and third time points, in which 94  
172 and 146 DEGs were identified, respectively. This result indicates there are probably no  
173 significant differences in gene expression patterns during the first attempts of spider mite in both  
174 susceptible and resistant reactions. However, gene expression patterns were more different  
175 during the second phase of infestation depending on the resistance/susceptibility of the plant.

176 **Fig 1. Venn diagram showing the number of specific, commonalities and differences DEGs**  
177 **between pair time points in both cultivars. Up\_T0, genes upregulated in resistant cultivar**  
178 **in comparison with susceptible cultivar at first time point. Down\_T0, genes downregulated**  
179 **in resistant cultivar or upregulated in susceptible cultivar at first time point. T1 and T5**  
180 **represent the second and third time points, respectively.**

181 Gene expression patterns were also different with the extension of infestation time depending on  
182 the resistance/susceptibility of common bean cultivars. Among DEGs, approximately 44% and  
183 37% of up-regulated genes were common among three time points, while less than 7% of down-  
184 regulated genes were shared among times in both cultivars. Interestingly, there was no any  
185 common up or down regulated gene between T0T1 (comparison of first and second time points)  
186 and T1T5 (comparison of second and third time points) and also any unique gene for T0T5  
187 (comparison of first and third time points). As shown in the Venn diagram in Fig 2, the number  
188 of uregulated DEGs in T0T5 comparison was higher than T0T1 comparison in both cultivars.

189 This analysis indicated that more than 70% and 85% of DEGs were common between T0T1 and  
190 T0T5 comparisons, respectively.

191 **Fig 2. Venn diagram representing commonly and specifically up- and down-regulated**  
192 **genes between two sets in each cultivar. Pink circle (first set) represents the comparison of**  
193 **first and second time points and green (second set) is the comparison of first and third**  
194 **time points. Up and Down represent upregulated, downregulated genes. Res and Sus**  
195 **represent resistant and susceptible cultivars.**

## 196 Functional Classification and GO enrichment analysis of DEGs

197 To eliminate the effects of genetic differences, DEGs were compared between cultivars at the  
198 same time points. GO analysis detected 57, 39 and 46 categories, according to biological process  
199 (P), molecular function (F), and cellular component (C) among all up- and down-regulated genes  
200 at time 0, 1 and 5, respectively.

## 201 Secondary Metabolism

202 The differences between control samples was determined by the metabolism of phenylpropanoid,  
203 a central secondary metabolite production of defense-related compounds [23-25], including  
204 anthocyanins and flavonoids (Fig 3). The two most induced genes involved in flavonoid  
205 biosynthesis process corresponded to dihydroflavonol reductase (DFR) and chalcone synthase  
206 (CHS). We found transcripts of DFR which were up-regulated in resistant cultivar (Fig 4). DFR  
207 has been previously reported as induced by *Fusarium oxysporum* inoculations on *Linum*  
208 *usitatissimum* [26]. *Colletotrichum camelliae* on *Camellia sinensis* [27] and *Elsinoe ampelina* in  
209 *grapevine* [28]. DFR is also a key regulatory point belonging to the subgroup of late anthocyanin  
210 biosynthesis genes which can be activated by TFs such as MYBs [29, 30]. CHS showed more  
211 than 7-fold change increase in resistant cultivar. O-methyltransferases (OMTs), involved in  
212 phenylpropanoids, flavonoids, and anthocyanin methylation, was up-regulated in resistant  
213 cultivar and showed an 8-fold increase in expression level upon spider mite feeding. O-  
214 Methylation plays key roles in plant defense following pathogen attack [31]. Additionally, the  
215 interaction network suggests the possible involvement of *CYP* genes (*CYP72A7* and  
216 *CYP71A26*) in resistance, previously reported in several studies [32, 33]. In the susceptible  
217 genotype, *CYP83B1* gene required for the synthesis of indole glucosinolates, was down-

218 regulated during infestation which is not consistent with previous reports in a number of  
219 researches [26, 34]. Finally, other secondary metabolism gene (BAS: beta-amyrin synthase) with  
220 higher transcript abundance in resistant cultivar was related to sesquiterpenoid and triterpenoid  
221 biosynthesis.

222 **Fig 3.**  enrichment analysis for up-regulated genes in resistant cultivar as compared to  
223 susceptible cultivar at day 0 (control samples). Boxes in the graph represent GO IDs, term  
224 definitions and statistical information. Significant GO terms ( $p \leq 0.05$ ) are marked with  
225 color. The degree of color saturation of a box is positively correlated to the enrichment  
226 level of the term.

227 **Fig 4.**  Interaction networks of up-regulated genes identified in resistance cultivar as  
228 compared to susceptible cultivar at day 0 (control samples).

## 229 **Transcriptional Regulation**

230 TF families found in our study are widely reported to be involved in plant defense responses,  
231 including MYB, WRKY, ethylene responsive factors (ERFs), zinc finger domain proteins and  
232 basic helix-loop-helix (bHLH). A key TF that currently appears in the studies of plant-pathogen  
233 interactions [26, 35] and had a significant expression in resistant cultivar of our study is  
234 MYB113. **TRANSPARENT TESTA4** 4), a chalcone and stilbene synthase family protein, is a  
235 key enzyme involved in the biosynthesis of flavonoids to encode chalcone synthase (CHS), and  
236 is required for the accumulation of purple anthocyanins in leaves and stems [36]. TT4 along with  
237 TRANSPARENT TESTA8 (TT8), a bHLH DNA-binding superfamily protein which is required  
238 for normal expression of DFR [37] associated with MYB113 in the interaction network. An  
239 important candidate TF for spider mite resistance is WD40 protein, which was expressed only  
240 during mite infestation in the resistant cultivar. Many studies have shown that a conserved *MYB*-  
241 **bHLH-WD40** BW) regulatory complex control the expression of anthocyanin biosynthesis  
242 genes [38]. So, we deduced that MBW regulatory complex has the same function in common  
243 bean and is involved in resistance. In addition, another TF for spider mite resistance may be TCP  
244 protein, ~~whose~~  expression was increased during spider mite infestation in the resistant cultivar.  
245 Recent studies suggested that TCP proteins play an important role in systemic acquired  
246 resistance (SAR) which is induced plant immunity, activated by pathogen infection [39-41].

247 Additionally, we identified a gene encoding WRKY50 which was significantly up-regulated in  
248 resistant cultivar during the middle-to-late stages (at day 5) of spider mite feeding. The spider  
249 mite infestation also affected the expression levels of Cys2/His2-type and C2H2-type zinc finger  
250 proteins as up-regulated genes in resistance and susceptible cultivars at day 5 post-infestation,  
251 respectively. The Cys2/His2-type zinc finger proteins are not only related to plant stress  
252 responses, but also enhance the resistance against pathogen infection [42]. ERFs, another  
253 important group of TFs, which play roles in integrating ET/JA signals [30, 43], activating the  
254 phenylpropanoid biosynthetic pathway and expression of resistance genes [44, 45], were  
255 activated in resistance cultivar at day 5 post-infestation. We observed increased transcript  
256 abundance of two key ERFs, including ERF1 and ERF9. The role of ERF1 as a regulator of  
257 ethylene responses after pathogen attack has been documented in *Arabidopsis* [46] but ERF9 has  
258 not proven to be relevant in the defense responses.

## 259 **Hormone Regulation**

260 GO enrichment analysis showed other GO terms that significantly overrepresented among up-  
261 regulated genes of resistant cultivar, including “response to stress”, “response to stimulus” and  
262 “response to jasmonic acid”. JA signaling has closely been associated with defense mechanisms  
263 against pathogens and insects [47, 48]. In our study, 13S-lipoxygenase 2 (LOX2),  A signaling  
264 and biogenesis gene, was detected as up-regulated gene in resistant cultivar, where it had a low  
265 transcript abundance in susceptible cultivar. Up-regulation of allene oxide synthase (AOS),  
266 needed to JA production, at day 1 post-feeding suggests that common bean resistance to the  
267 disease is enhanced by the activation of JA signaling pathways. Our result is corroborated with  
268 the previous studies where the expression levels of *LOX* and *AOS* significantly increased after  
269 infestation [26, 49]. In addition, the expression of two auxin signaling pathway genes, *SAUR*  
270 (small auxin-up RNA) and *ARF5* (Auxin response factor 5), were down- and up-regulated in  
271 resistant cultivar, respectively. *SAUR* genes are related to cell division [50, 51] and reportedly  
272 regulated by the auxin level, indicating that this process could be impaired by spider mite  
273 feeding. The down-regulation of *SAUR* gene is in agreement with the previous studies on *A.*  
274 *thaliana* [52] and soybean [53].

## 275 **Pathogen Elicitor Perception**



276 In our study, only one disease resistance protein from TIR-NBS-LRRs class  
277 (Phvul.005G093400.1) had higher transcript abundance in resistance cultivar, while one TIR-  
278 NBS-LRR (Phvul.010G029800.1), two NB-ARC domains-containing (Phvul.002G130666.1,  
279 Phvul.010G064700.1), and one CC-NBS-LRR (Phvul.003G247601.1) showed a high level of  
280 expression in susceptible cultivar before infestation. During the first stage of mite infestation,  
281 five TIR-NBS-LRRs (Phvul.002G323100.1, Phvul.002G323400.2, Phvul.004G046400.1,  
282 Phvul.011G140300.1 and Phvul.010G132433.1), three NB-ARC (Phvul.003G002926.1,  
283 Phvul.004G013300.1 and Phvul.008G071300.3) and one leucine-rich repeat (LRR) protein  
284 kinase (Phvul.007G087550.1) were highly expressed in resistance cultivar, whereas one TIR-  
285 NBS-LRR (Phvul.004G058700.1) and three NB-ARC (Phvul.008G031200.10,  
286 Phvul.010G064700.1, Phvul.011G195400.1) were found to be up-regulated in susceptible  
287 common bean cultivar. But these genes could not fully exert their expression with the extension  
288 of infestation time except one NB-ARC (Phvul.010G064700.1) in susceptible cultivar. At the  
289 first glance, it seems that the susceptible cultivar has a higher number of up-regulated disease  
290 resistance genes than the resistant one before mite infestation. But our results indicated that the  
291 response of the resistant plants was more robust than that of the susceptible cultivar upon  
292 pathogen attack. This can be elucidated by the role of miRNAs in down-regulating defense-  
293 related genes expression in susceptible cultivar [54, 55]. The non-specific defense responses to  
294 deter the pathogen can also explain loss of defense-related genes expression at fifth day.  
295 In addition, one gene encoding the Cysteine-rich RLK (CRK10) was highly expressed upon  
296 spider feeding. This highly up-regulated *CRK* gene seems to indicate its potential role in  
297 resistance against spider mite. We also observed receptor-like proteins (RLPs) and receptor-like  
298 kinase (RLK) genes that have a direct effect on the pathogen in the both cultivars [56].

## 299 **Antioxidant and detoxification processes**

300 Reactive oxygen species (ROS) are involved in various processes along the plant life, but are  
301 best known as a key component of the signaling events involved in abiotic and biotic stress  
302 responses, so that are rapidly induced and accumulated after pathogen attack [57]. An important  
303 response to control ROS is the induction of scavenging genes. In this respect, heat shock proteins  
304 (HSPs) play an important role in supporting ROS scavenging activity and stress tolerance [58].  
305 In our study, HSP 70 was found to be up-regulated during spider mite feeding only in resistant

306 cultivar, which highlight the function of HSPs in plant defense against pathogenic infection and  
307 reduce accumulation of ROS. This notion can be supported by the *P. vulgaris-Colletotrichum*  
308 interaction study [59], that HSPs are highly expressed against *Colletotrichum lindemuthianum*  
309 infection. Among detoxification genes, UDP-glycosyltransferase significantly up-regulated in  
310 resistant cultivar at all-time points, suggesting this gene may play an important role in the  
311 common bean resistance to spider mite feeding. The previous studies conducted on nematode  
312 attack in wheat (Qiao et al, 2018) and *Fusarium* in *Brachypodium distachyon* (Schweiger et al,  
313 2013) reinforces our argument about UDP-glycosyltransferase function.

### 314 **Cell wall**

315 Xyloglucan endotransglucosylase/hydrolases (XTHs) are a family of enzymes that facilitate cell  
316 wall expansion [60] and also have the functions, probably associated with resistance mechanism  
317 [61]. In current study, we observed two XTHs (XTH22: Phvul.003G147700 and XTH9  
318 :Phvul.005G111300) in resistant cultivar significantly expressed at day 1 post infestation.  
319 Another important candidate gene for spider mite resistance may be the malectin-like receptor  
320 kinase FERONIA (FER), which was up-regulated and showed increase abundance during mite  
321 infestation, although there is no significant information on the role of this gene in response to  
322 feeding.

### 323 **Other genes**

324 There are substantial reports regarding expression of pathogenesis-related (PR) genes under  
325 numerous stresses in common bean [59, 62]. Our transcriptome study successfully identified one  
326 PR-5 like receptor kinase (Phvul.004G155500) as up-regulated gene in resistant cultivar at day 5.  
327 2-oxoglutarate (2OG) and Fe (II)-dependent oxygenase is another up-regulated gene in resistance  
328 cultivar under infestation which make it a potential candidate gene for resistance against spider  
329 mite and probably suitable for breeding programs. This gene has been previously described as  
330 responsive to pathogens [26].

### 331 **Validation of DEGs by using qRT-PCR**

332 In order to verify gene expression results of transcriptome data analysis, six DEGs having  
333 annotations were selected for qRT-PCR analysis. They include the genes encoding pathogenesis-  
334 related proteins PR5, heat shock protein, leucine rich repeat, MYB113, XTH and a WRKY50

335 (Fig 5). Quantitative RT-PCR analysis was conducted on 12 RNA samples that were used in the  
336 preparation of sequencing libraries. Relative expression profiles of DEGs in the both resistant  
337 and susceptible evaluated using qRT-PCR were in complete agreement with the RNA-seq data.  
338 This is in line with other studies, which showed almost the same level of fold changes between  
339 RNA-seq data and qPCR [63, 64].

340 **Fig 5. qRT-PCR results of genes selected from the RNA-seq analysis of common bean–**  
341 **spider mite interaction. Expression levels of tested genes were normalized based on of *Actin***  
342 **gene and then compared to relative expression values determined by RNA-seq. Relative**  
343 **expression values of samples were determined by using the average expression value of all**  
344 **replicates of a particular group. Standard deviation among replicates is represented by**  
345 **error bars. Res and Sus represent resistant and susceptible cultivars. TP0, TP1 and TP5**  
346 **represent first, second and third time points. RT and RS in parentheses represent qRT-**  
347 **PCR and RNA-seq.**

## 348 **Conclusion**

349 To our knowledge, this investigation is the first study to identify molecular mechanisms involved  
350 in the common bean resistance to spider mite feeding by using RNA sequencing technology. In  
351 summary, DEGs were identified for control samples ~~and~~ 1 and  days after infestation of spider  
352 mite in resistant and susceptible cultivars of common bean. Importantly, we identified secondary  
353 metabolism, multiple disease resistance proteins, TFs and genes involved in cell wall expansion  
354 and antioxidant processes that were modulated by spider mite attack. Overall, this study  
355 extended our understanding of the defense molecular mechanisms of two common bean cultivars  
356 with different genetic backgrounds during spider mite infestation. We came to the conclusion  
357 that these data provide important and valuable information for future research in common bean.

358

359

360

361

362 **Availability of supporting data**

363 All RNA-Seq data were deposited to the NCBI sequence read archive (SRA) under the project  
364 PRJNA482175.

365 **Declarations**

366 **Ethics approval and consent to participate**

367 Not applicable.

368 **Consent to Publication**

369 Not applicable.

370 **Competing interest**

371 The authors have no competing interests to declare.

372 **Author contribution statement**

373 AHH, RMA, HA and MS participated in the experimental design. MS collected the samples.  
374 MS, MTM and RM performed RNA extraction. AS carried out bioinformatics analyses and  
375 wrote the manuscript. All authors reviewed and approved the final manuscript for publication.

376

377

378

379

380

381

382

383

384

385

386

## References

- 388 1. McConnell M, Mamidi S, Lee R, Chikara S, Rossi M, Papa R, et al. Syntenic  
389 relationships among legumes revealed using a gene-based genetic linkage map of common  
390 bean (*Phaseolus vulgaris* L.). TAG Theoretical and applied genetics Theoretische und  
391 angewandte Genetik. 2010;121:1103-16. doi: 10.1007/s00122-010-1375-9.
- 392 2. Castro-Guerrero NA, Isidra-Arellano MC, Mendoza-Cozatl DG, Valdés-López O.  
393 Common Bean: A Legume Model on the Rise for Unraveling Responses and Adaptations to  
394 Iron, Zinc, and Phosphate Deficiencies. Front Plant Sci. 2016;7:600-. doi:  
395 10.3389/fpls.2016.00600. PubMed PMID: 27200068.
- 396 3. Broughton WJ, Hernández G, Blair M, Beebe S, Gepts P, Vanderleyden J. Beans  
397 (*Phaseolus* spp.) – model food legumes. Plant and Soil. 2003;252(1):55-128. doi:  
398 10.1023/A:1024146710611.
- 399 4. Tiwari M, Singh NK, Rathore M, Kumar N. RAPD markers in the analysis of genetic  
400 diversity among common bean germplasm from Central Himalaya. Genetic Resources and Crop  
401 Evolution. 2005;52(3):315-24. doi: 10.1007/s10722-005-5123-y.
- 402 5. Ghasemi Pirbalouti A, Golparvar G, Ali Rostampoor S. Evaluation of Seed Yield and  
403 Yield Components of Common Bean Iranian Cultivars for Inoculation with Four Strains of  
404 *Rhizobium leguminosarum* biovar phaseoli. Journal of Agronomy. 2006;5. doi:  
405 10.3923/ja.2006.382.386.
- 406 6. Katungi E, Sperling L, Karanja D, Farrow A, Beebe S. Relative importance of common  
407 bean attributes and variety demand in the drought area of Kenya. J Dev Agric Econ. 2011;3.
- 408 7. Capinera JL. Greenhouse Whitefly, *Trialeurodes vaporariorum* (Westwood) (Hemiptera:  
409 Aleyrodidae). In: Capinera JL, editor. Encyclopedia of Entomology. Dordrecht: Springer  
410 Netherlands; 2008. p. 1723-6.
- 411 8. Bensoussan N, Santamaria ME, Zhurov V, Diaz I, Grbić M, Grbić V. Plant-Herbivore  
412 Interaction: Dissection of the Cellular Pattern of *Tetranychus urticae* Feeding on the Host Plant.  
413 Front Plant Sci. 2016;7:1105-. doi: 10.3389/fpls.2016.01105. PubMed PMID: 27512397.
- 414 9. Kiełkiewicz M, Barczak-Brzyżek A, Karpińska B, Filipecki M. Unravelling the Complexity  
415 of Plant Defense Induced by a Simultaneous and Sequential Mite and Aphid Infestation. Int J  
416 Mol Sci. 2019;20(4):806. doi: 10.3390/ijms20040806. PubMed PMID: 30781828.
- 417 10. Sharma HC, Sharma K, Seetharama N, Ortiz R. Prospects for using transgenic  
418 resistance to insects in crop improvement. Electronic Journal of Biotechnology. 2000;3:21-2.  
419 doi: 10.4067/S0717-34582000000200001.
- 420 11. Smith C. Plant Resistance to Arthropods: Molecular and Conventional Approaches 2005.  
421 1-423 p.
- 422 12. Shoorooei M, Hoseinzadeh AH, Maali-Amiri R, Allahyari H, Torkzadeh-Mahani M.  
423 Antixenosis and antibiosis response of common bean (*Phaseolus vulgaris*) to two-spotted spider  
424 mite (*Tetranychus urticae*). Experimental and Applied Acarology. 2018;74(4):365-81. doi:  
425 10.1007/s10493-018-0240-4.
- 426 13. Meier U. Growth stages of mono- and dicotyledonous plants: Berlin : Blackwell  
427 Wissenschafts-Verlag; 1997.
- 428 14. Bolger AM, Lohse M, Usadel B. Trimmomatic: a flexible trimmer for Illumina sequence  
429 data. Bioinformatics (Oxford, England). 2014;30(15):2114-20. Epub 2014/04/01. doi:  
430 10.1093/bioinformatics/btu170. PubMed PMID: 24695404.
- 431 15. Schmutz J, McClean PE, Mamidi S, Wu GA, Cannon SB, Grimwood J, et al. A reference  
432 genome for common bean and genome-wide analysis of dual domestications. Nature Genetics.  
433 2014;46:707. doi: 10.1038/ng.3008  
434 <https://www.nature.com/articles/ng.3008#supplementary-information>.

- 435 16. Grbić M, Van Leeuwen T, Clark RM, Rombauts S, Rouzé P, Grbić V, et al. The genome  
436 of *Tetranychus urticae* reveals herbivorous pest adaptations. *Nature*. 2011;479:487. doi:  
437 10.1038/nature10640  
438 <https://www.nature.com/articles/nature10640#supplementary-information>.
- 439 17. Dobin A, Davis CA, Schlesinger F, Drenkow J, Zaleski C, Jha S, et al. STAR: ultrafast  
440 universal RNA-seq aligner. *Bioinformatics*. 2012;29(1):15-21. doi: 10.1093/bioinformatics/bts635  
441 %J *Bioinformatics*.
- 442 18. Trapnell C, Roberts A, Goff L, Pertea G, Kim D, Kelley DR, et al. Differential gene and  
443 transcript expression analysis of RNA-seq experiments with TopHat and Cufflinks. *Nat Protoc*.  
444 2012;7(3):562-78. doi: 10.1038/nprot.2012.016. PubMed PMID: 22383036.
- 445 19. Ghosh S, Chan C-KK. Analysis of RNA-Seq Data Using TopHat and Cufflinks. In:  
446 Edwards D, editor. *Plant Bioinformatics: Methods and Protocols*. New York, NY: Springer New  
447 York; 2016. p. 339-61.
- 448 20. Du Z, Zhou X, Ling Y, Zhang Z, Su Z. agriGO: a GO analysis toolkit for the agricultural  
449 community. *Nucleic Acids Res*. 2010;38(Web Server issue):W64-W70. Epub 2010/04/30. doi:  
450 10.1093/nar/gkq310. PubMed PMID: 20435677.
- 451 21. Untergasser A, Cutcutache I, Koressaar T, Ye J, C Faircloth B, Remm M, et al.  
452 Primer3—New Capabilities and Interfaces. *Nucleic Acids Res*. 2012;40:e115. doi:  
453 10.1093/nar/gks596.
- 454 22. Pfaffl MW, Horgan GW, Dempfle L. Relative expression software tool (REST) for group-  
455 wise comparison and statistical analysis of relative expression results in real-time PCR. *Nucleic*  
456 *Acids Res*. 2002;30(9):e36-e. doi: 10.1093/nar/30.9.e36. PubMed PMID: 11972351.
- 457 23. Ferrer JL, Austin MB, Stewart C, Noel JP. Structure and function of enzymes involved in  
458 the biosynthesis of phenylpropanoids. *Plant Physiology and Biochemistry*. 2008;46(3):356-70.  
459 doi: <https://doi.org/10.1016/j.plaphy.2007.12.009>.
- 460 24. Lea US, Slimestad R, Smedvig P, Lillo C. Nitrogen deficiency enhances expression of  
461 specific MYB and bHLH transcription factors and accumulation of end products in the flavonoid  
462 pathway. *Planta*. 2007;225(5):1245-53. doi: 10.1007/s00425-006-0414-x.
- 463 25. Kerio LC. The functional significance of anthocyanins in leaves: a review. *Tea*.  
464 2011;32(1):46-52.
- 465 26. Galindo-González L, Deyholos MK. RNA-seq Transcriptome Response of Flax (*Linum*  
466 *usitatissimum* L.) to the Pathogenic Fungus *Fusarium oxysporum* f. sp. *lini*. *Front Plant Sci*.  
467 2016;7:1766-. doi: 10.3389/fpls.2016.01766. PubMed PMID: 27933082.
- 468 27. Gao M, Wang Q, Wan R, Fei Z, Wang X. Identification of genes differentially expressed  
469 in grapevine associated with resistance to *Elsinoe ampelina* through suppressive subtraction  
470 hybridization. *Plant Physiology and Biochemistry*. 2012;58:253-68. doi:  
471 <https://doi.org/10.1016/j.plaphy.2012.07.009>.
- 472 28. Wang L, Wang Y, Cao H, Hao X, Zeng J, Yang Y, et al. Transcriptome Analysis of an  
473 Anthracnose-Resistant Tea Plant Cultivar Reveals Genes Associated with Resistance to  
474 *Colletotrichum camelliae*. *PLoS One*. 2016;11(2):e0148535-e. doi:  
475 10.1371/journal.pone.0148535. PubMed PMID: 26849553.
- 476 29. Petroni K, Tonelli C. Recent advances on the regulation of anthocyanin synthesis in  
477 reproductive organs. *Plant Science*. 2011;181(3):219-29. doi:  
478 <https://doi.org/10.1016/j.plantsci.2011.05.009>.
- 479 30. Li Z, Wang J, Zhang X, Xu L. Comparative transcriptome analysis of *Anthurium*  
480 "Alabama" and its anthocyanin-loss mutant. *PLoS One*. 2015;10(3):e0119027-e. doi:  
481 10.1371/journal.pone.0119027. PubMed PMID: 25781998.
- 482 31. C Lam K, Ibrahim R, Behdad B, Dayanandan S. Structure, function, and evolution of  
483 plant O -methyltransferases. *Genome / National Research Council Canada = Génome / Conseil*  
484 *national de recherches Canada*. 2007;50:1001-13. doi: 10.1139/g07-077.

- 485 32. Grubor VD, Heckel DG. Evaluation of the role of CYP6B cytochrome P450s in pyrethroid  
486 resistant Australian *Helicoverpa armigera*. *Insect Molecular Biology*. 2007;16(1):15-23. doi:  
487 10.1111/j.1365-2583.2006.00697.x.
- 488 33. Cifuentes D, Chynoweth R, Guillén J, De la Rúa P, Bielza P. Novel Cytochrome P450  
489 Genes, CYP6EB1 and CYP6EC1, are Over-Expressed in Acrinathrin-Resistant *Frankliniella*  
490 *occidentalis* (Thysanoptera: Thripidae). *Journal of Economic Entomology*. 2012;105. doi:  
491 10.1603/EC11335.
- 492 34. Becker M, Zhang X, Walker P, Wan J, Millar J, Khan D, et al. Transcriptome analysis of  
493 the *Brassica napus* - *Leptosphaeria maculans* pathosystem identifies receptor, signalling and  
494 structural genes underlying plant resistance. *The Plant journal : for cell and molecular biology*.  
495 2017;90. doi: 10.1111/tpj.13514.
- 496 35. Zhu Q-H, Stephen S, Kazan K, Jin G, Fan L, Taylor J, et al. Characterization of the  
497 defense transcriptome responsive to *Fusarium oxysporum*-infection in *Arabidopsis* using RNA-  
498 seq. *Gene*. 2013;512(2):259-66. doi: <https://doi.org/10.1016/j.gene.2012.10.036>.
- 499 36. Saslowsky D, Dana C, Winkel B. An allelic series for the chalcone synthase locus in  
500 *Arabidopsis*. *Gene*. 2000;255:127-38. doi: 10.1016/S0378-1119(00)00304-8.
- 501 37. Nesi N, Debeaujon I, Jond C, Pelletier G, Caboche M, Lepiniec L. The TT8 gene  
502 encodes a basic helix-loop-helix domain protein required for expression of DFR and BAN genes  
503 in *Arabidopsis* siliques. *Plant Cell*. 2000;12(10):1863-78. doi: 10.1105/tpc.12.10.1863. PubMed  
504 PMID: 11041882.
- 505 38. Xie Y, Tan H, Ma Z, Huang J. DELLA Proteins Promote Anthocyanin Biosynthesis via  
506 Sequestering MYBL2 and JAZ Suppressors of the MYB/bHLH/WD40 Complex in *Arabidopsis*  
507 *thaliana*. *Molecular Plant*. 2016;9(5):711-21. doi: <https://doi.org/10.1016/j.molp.2016.01.014>.
- 508 39. Mukhtar MS, Carvunis A-R, Dreze M, Epple P, Steinbrenner J, Moore J, et al.  
509 Independently Evolved Virulence Effectors Converge onto Hubs in a Plant Immune System  
510 Network. 2011;333(6042):596-601. doi: 10.1126/science.1203659 %J Science.
- 511 40. Fu ZQ, Dong X. Systemic Acquired Resistance: Turning Local Infection into Global  
512 Defense. 2013;64(1):839-63. doi: 10.1146/annurev-arplant-042811-105606. PubMed PMID:  
513 23373699.
- 514 41. Weßling R, Epple P, Altmann S, He Y, Yang L, Henz Stefan R, et al. Convergent  
515 Targeting of a Common Host Protein-Network by Pathogen Effectors from Three Kingdoms of  
516 Life. *Cell Host & Microbe*. 2014;16(3):364-75. doi: <https://doi.org/10.1016/j.chom.2014.08.004>.
- 517 42. Kim SH, Hong JK, Lee SC, Sohn KH, Jung HW, Hwang BK. CAZFP1, Cys2/His2-type  
518 zinc-finger transcription factor gene functions as a pathogen-induced early-defense gene in  
519 *Capsicum annuum*. *Plant Molecular Biology*. 2004;55(6):883-904. doi: 10.1007/s11103-005-  
520 2151-0.
- 521 43. Zhu Y, Shao J, Zhou Z, Davis RE. Comparative Transcriptome Analysis Reveals a  
522 Preformed Defense System in Apple Root of a Resistant Genotype of G.935 in the Absence of  
523 Pathogen. *Int J Plant Genomics*. 2017;2017:8950746-. Epub 2017/03/30. doi:  
524 10.1155/2017/8950746. PubMed PMID: 28465679.
- 525 44. Rushton PJ, Somssich IE, Ringler P, Shen QJ. WRKY transcription factors. *Trends in*  
526 *Plant Science*. 2010;15(5):247-58. doi: <https://doi.org/10.1016/j.tplants.2010.02.006>.
- 527 45. De Geyter N, Gholami A, Goormachtig S, Goossens A. Transcriptional machineries in  
528 jasmonate-elicited plant secondary metabolism. *Trends in Plant Science*. 2012;17(6):349-59.  
529 doi: <https://doi.org/10.1016/j.tplants.2012.03.001>.
- 530 46. Berrocal-Lobo M, Molina A. Ethylene Response Factor 1 Mediates *Arabidopsis*  
531 Resistance to the Soilborne Fungus *Fusarium oxysporum*. 2004;17(7):763-70. doi:  
532 10.1094/mpmi.2004.17.7.763. PubMed PMID: 15242170.
- 533 47. Guerreiro A, Figueiredo J, Sousa Silva M, Figueiredo A. Linking Jasmonic Acid to  
534 Grapevine Resistance against the Biotrophic Oomycete *Plasmopara viticola*. *Front Plant Sci*.  
535 2016;7:565-. doi: 10.3389/fpls.2016.00565. PubMed PMID: 27200038.

536 48. Wang W-W, Zheng C, Hao W-J, Ma C-L, Ma J-Q, Ni D-J, et al. Transcriptome and  
537 metabolome analysis reveal candidate genes and biochemicals involved in tea geometrid  
538 defense in *Camellia sinensis*. *PLoS One*. 2018;13(8):e0201670-e. doi:  
539 10.1371/journal.pone.0201670. PubMed PMID: 30067831.

540 49. Chen T, Lv Y, Zhao T, Li N, Yang Y, Yu W, et al. Comparative transcriptome profiling of  
541 a resistant vs. susceptible tomato (*Solanum lycopersicum*) cultivar in response to infection by  
542 tomato yellow leaf curl virus. *PLoS One*. 2013;8(11):e80816-e. doi:  
543 10.1371/journal.pone.0080816. PubMed PMID: 24260487.

544 50. Spartz AK, Lee SH, Wenger JP, Gonzalez N, Itoh H, Inzé D, et al. The SAUR19  
545 subfamily of SMALL AUXIN UP RNA genes promote cell expansion. *The Plant Journal*.  
546 2012;70(6):978-90. doi: 10.1111/j.1365-313X.2012.04946.x.

547 51. Markakis MN, Boron AK, Van Loock B, Saini K, Cirera S, Verbelen J-P, et al.  
548 Characterization of a small auxin-up RNA (SAUR)-like gene involved in *Arabidopsis thaliana*  
549 development. *PLoS One*. 2013;8(11):e82596-e. doi: 10.1371/journal.pone.0082596. PubMed  
550 PMID: 24312429.

551 52. Chen YC, Wong CL, Muzzi F, Vlaardingerbroek I, Kidd BN, Schenk PM. Root defense  
552 analysis against *Fusarium oxysporum* reveals new regulators to confer resistance. *Scientific*  
553 *Reports*. 2014;4:5584. doi: 10.1038/srep05584  
554 <https://www.nature.com/articles/srep05584#supplementary-information>.

555 53. Ban Y-W, Samir Roy N, Yang H, Choi H-K, Kim J-H, Basnet P, et al. Comparative  
556 transcriptome analysis reveals higher expression of stress and defense responsive genes in  
557 dwarf soybeans obtained from the crossing of *G. max* and *G. soja*2018.

558 54. Navarro L, Dunoyer P, Jay F, Arnold B, Dharmasiri N, Estelle M, et al. A Plant miRNA  
559 Contributes to Antibacterial Resistance by Repressing Auxin Signaling. 2006;312(5772):436-9.  
560 doi: 10.1126/science.1126088 %J Science.

561 55. Li Y, Zhang Y, Shi D, Liu X, Qin J, Ge Q, et al. Spatial-temporal analysis of zinc  
562 homeostasis reveals the response mechanisms to acute zinc deficiency in *Sorghum bicolor*.  
563 *New Phytologist*. 2013;200(4):1102-15. doi: 10.1111/nph.12434.

564 56. Gouveia BC, Calil IP, Machado JPB, Santos AA, Fontes EPB. Immune Receptors and  
565 Co-receptors in Antiviral Innate Immunity in Plants. 2017;7(2139). doi:  
566 10.3389/fmicb.2016.02139.

567 57. Mhamdi A, Van Breusegem F. Reactive oxygen species in plant development.  
568 2018;145(15):dev164376. doi: 10.1242/dev.164376 %J Development.

569 58. Driedonks N, Xu J, Peters JL, Park S, Rieu I. Multi-Level Interactions Between Heat  
570 Shock Factors, Heat Shock Proteins, and the Redox System Regulate Acclimation to Heat.  
571 *Front Plant Sci*. 2015;6:999-. doi: 10.3389/fpls.2015.00999. PubMed PMID: 26635827.

572 59. Padder BA, Kamfwa K, Awale HE, Kelly JD. Transcriptome Profiling of the *Phaseolus*  
573 *vulgaris* - *Colletotrichum lindemuthianum* Pathosystem. *PLoS One*. 2016;11(11):e0165823. doi:  
574 10.1371/journal.pone.0165823.

575 60. Sasidharan R, Voesenek LACJ, Pierik R. Cell Wall Modifying Proteins Mediate Plant  
576 Acclimatization to Biotic and Abiotic Stresses. *Critical Reviews in Plant Sciences*.  
577 2011;30(6):548-62. doi: 10.1080/07352689.2011.615706.

578 61. Jiang Y, Dong J, Chen R, Gao X, Xu Z. Isolation of a novel PP2C gene from rice and its  
579 response to abiotic stresses. *African Journal of Biotechnology*. 2011;10:7143-54.

580 62. Jain S, Chittem K, Brueggeman R, Osorno JM, Richards J, Nelson BD, Jr. Comparative  
581 Transcriptome Analysis of Resistant and Susceptible Common Bean Genotypes in Response to  
582 Soybean Cyst Nematode Infection. *PLoS One*. 2016;11(7):e0159338. doi:  
583 10.1371/journal.pone.0159338.

584 63. Liu J, Xu Y, Zhang L, Li W, Cai Z, Li F, et al. De novo assembly and analysis of the  
585 transcriptome of *Rumex patientia* L. during cold stress. *PLoS One*. 2017;12(10):e0186470-e.  
586 doi: 10.1371/journal.pone.0186470. PubMed PMID: 29023590.



587 64. Musacchia F, Vasilev F, Borra M, Biffali E, Sanges R, Santella L, et al. De novo  
588 assembly of a transcriptome from the eggs and early embryos of *Astropecten aranciacus*. PLoS  
589 One. 2017;12(9):e0184090-e. doi: 10.1371/journal.pone.0184090. PubMed PMID: 28873438.  
590

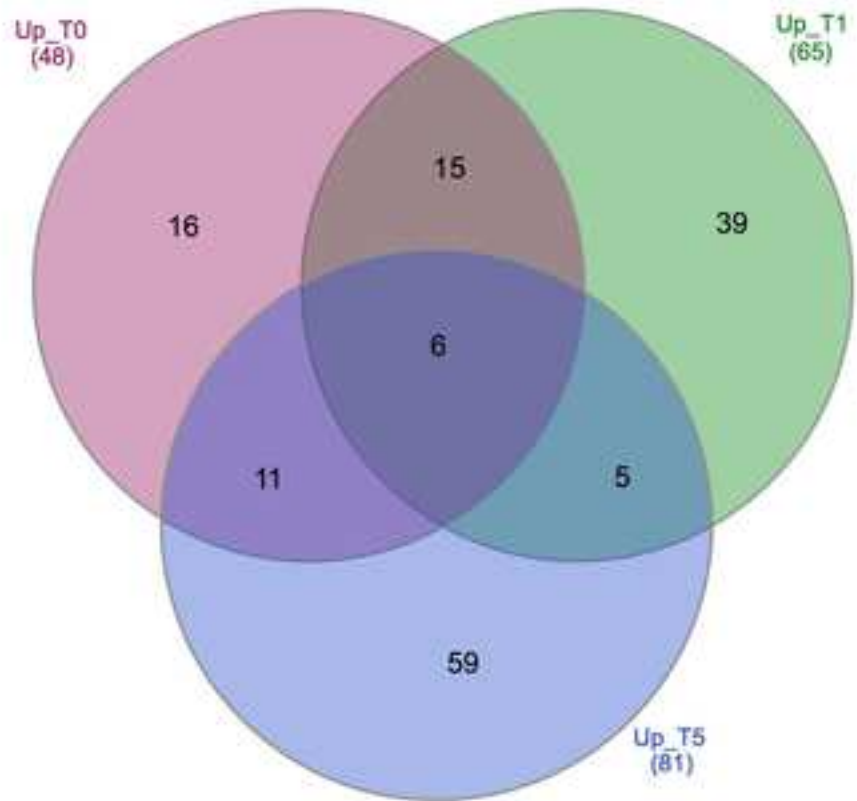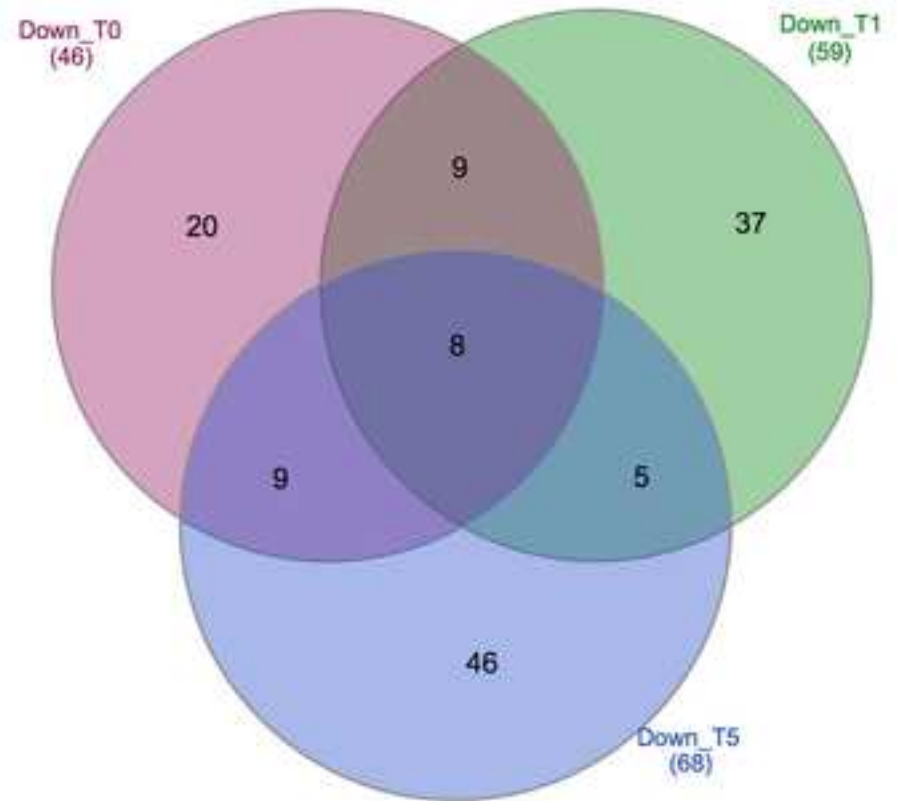

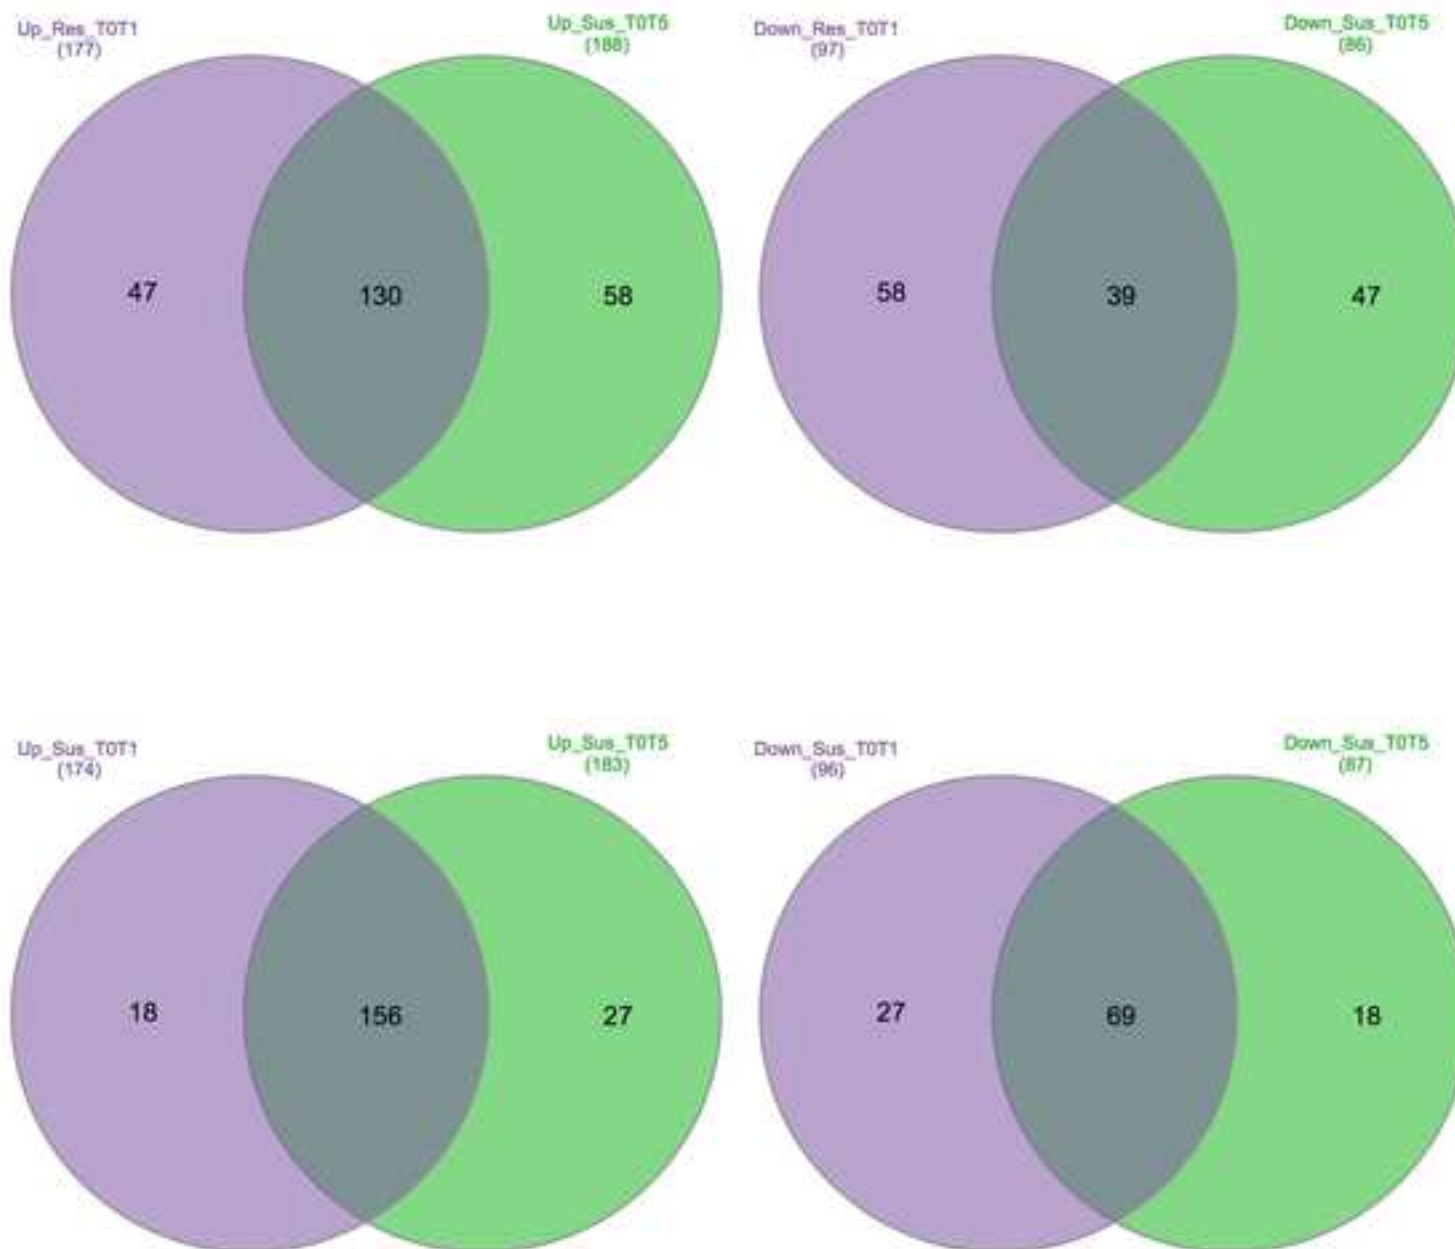



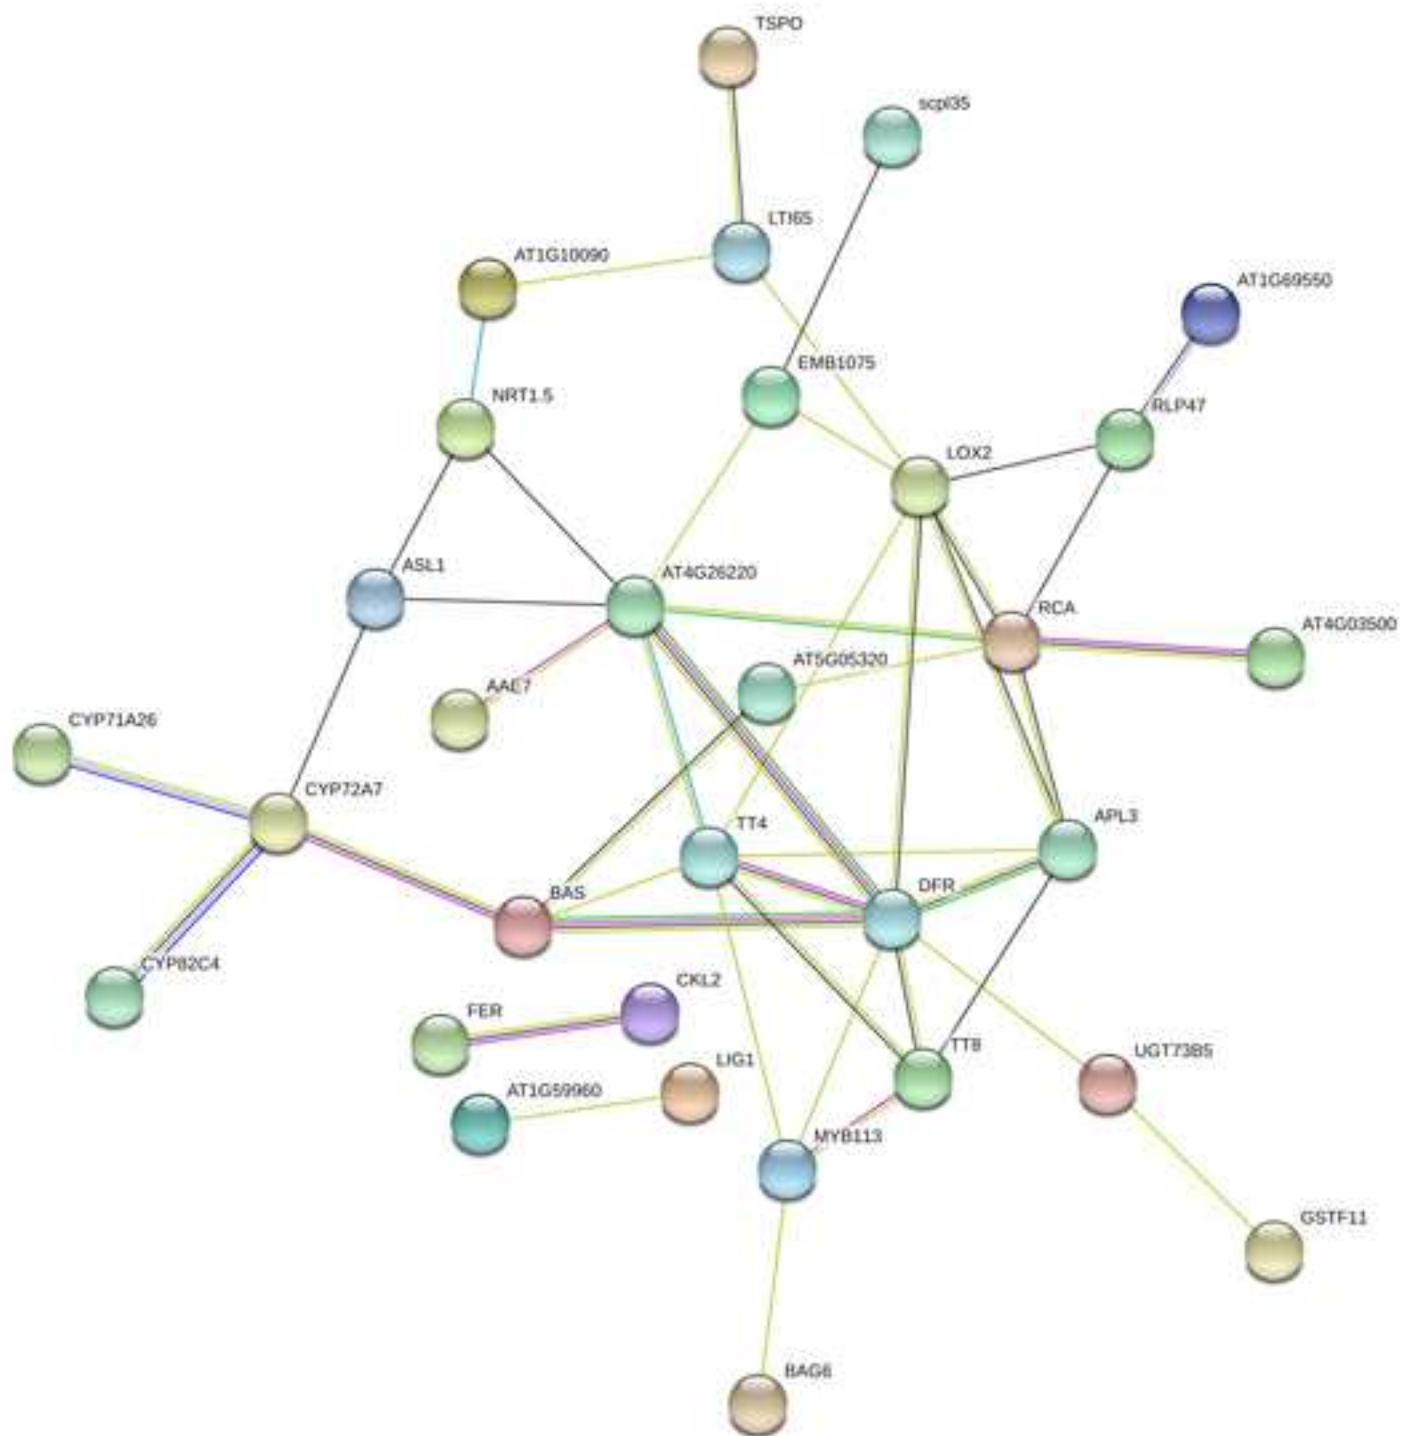

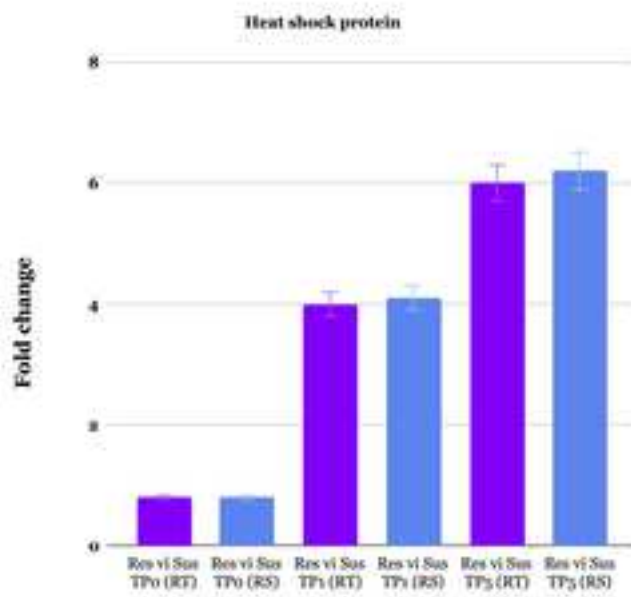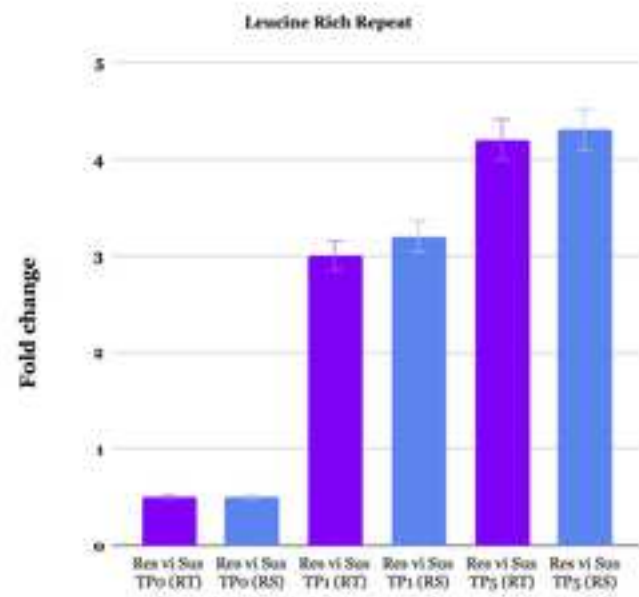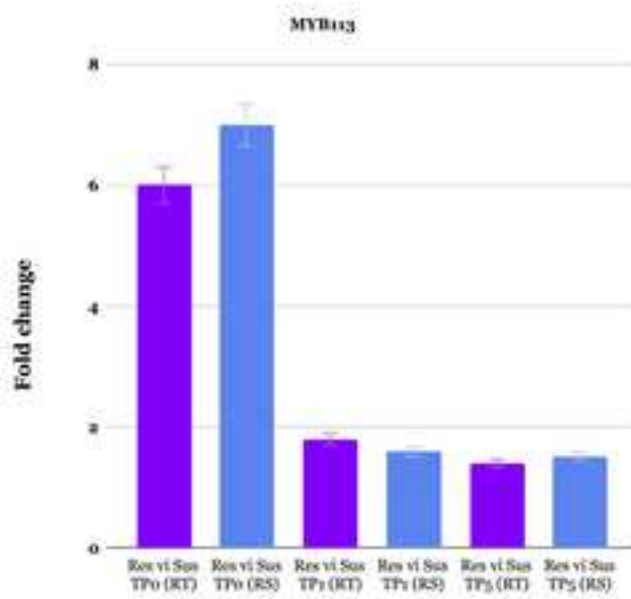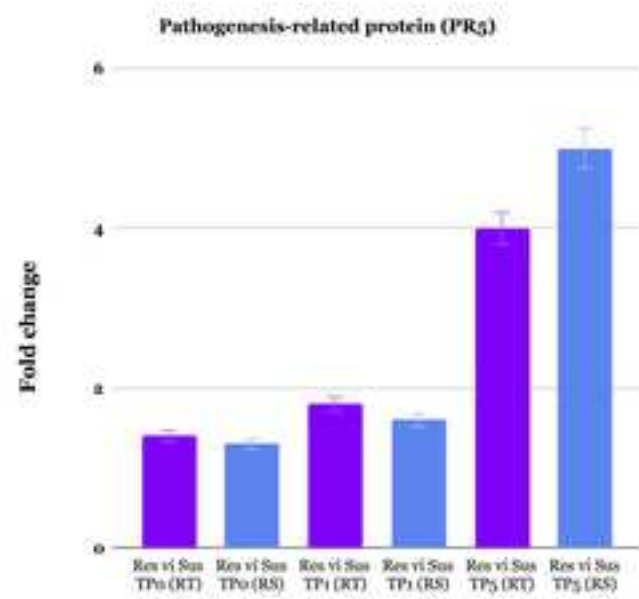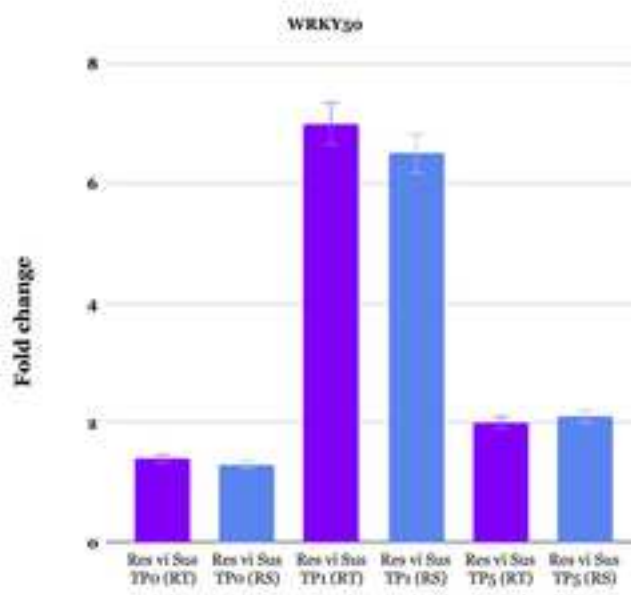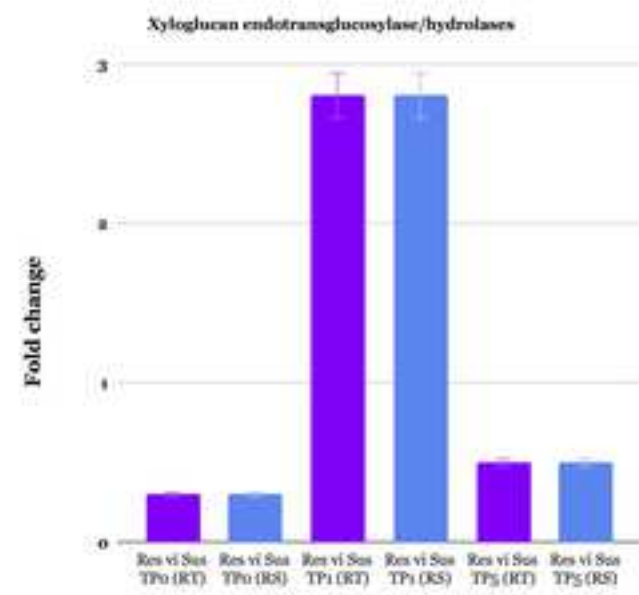



Click here to access/download  
**Supporting Information**  
Supplementary Tables.xlsx



Supplement: pone.0228680.s009.pdf [file pone.0228680.s009.pdf]
