# Supplementary material for: Comparative transcriptome provides molecular insight into defense-associated mechanisms against spider mite in resistant and susceptible common bean cultivars
Source: PLoS One. 2020 Feb 4;15(2):e0228680. doi: 10.1371/journal.pone.0228680 (PMC6999899; doi:10.1371/journal.pone.0228680)
Supplement: S1 Table — (XLSX) [file pone.0228680.s001.xlsx]

## Sheet: S1 Table  
S1 Table: List of DEGs among time points in resistant cultivar
Gene ID	Annotation	Sample 1	Sample 2	FPKM value_Sample 1	FPKM value_Sample 2	log2(fold change)
Phvul.001G012700.1	dihydroflavonol 4-reductase	ResCul_Time0	ResCul_Time1D	5.21482	0	-inf
		ResCul_Time0	ResCul_Time5D	5.21482	0.710984	-2.87473
		ResCul_Time1D	ResCul_Time5D	0	0.710984	inf
Phvul.001G012800.1	dihydroflavonol 4-reductase	ResCul_Time0	ResCul_Time1D	10.0906	0	-inf
		ResCul_Time0	ResCul_Time5D	10.0906	1.66745	-2.5973
		ResCul_Time1D	ResCul_Time5D	0	1.66745	inf
Phvul.001G014300.1	RAD-like 1	ResCul_Time0	ResCul_Time1D	6.12522	12.8389	1.06768
		ResCul_Time0	ResCul_Time5D	6.12522	0	-inf
		ResCul_Time1D	ResCul_Time5D	12.8389	0	-inf
Phvul.001G019300.1	Protein of unknown function (DUF1645)	ResCul_Time0	ResCul_Time1D	0	0	0
		ResCul_Time0	ResCul_Time5D	0	18.4867	inf
		ResCul_Time1D	ResCul_Time5D	0	18.4867	inf
Phvul.001G020100.1	phospholipase A 2A	ResCul_Time0	ResCul_Time1D	4.41041	107.465	4.60681
		ResCul_Time0	ResCul_Time5D	4.41041	23.3878	2.40677
		ResCul_Time1D	ResCul_Time5D	107.465	23.3878	-2.20004
Phvul.001G026700.1	salt tolerance zinc finger	ResCul_Time0	ResCul_Time1D	24.8441	25.0652	0.012783
		ResCul_Time0	ResCul_Time5D	24.8441	347.973	3.808
		ResCul_Time1D	ResCul_Time5D	25.0652	347.973	3.79522
Phvul.001G032150.1	Homeobox-leucine zipper protein family	ResCul_Time0	ResCul_Time1D	0.90475	4.60582	2.34787
		ResCul_Time0	ResCul_Time5D	0.90475	0	-inf
		ResCul_Time1D	ResCul_Time5D	4.60582	0	-inf
Phvul.001G040600.1	Concanavalin A-like lectin protein kinase family protein	ResCul_Time0	ResCul_Time1D	0	0	0
		ResCul_Time0	ResCul_Time5D	0	5.26975	inf
		ResCul_Time1D	ResCul_Time5D	0	5.26975	inf
Phvul.001G040800.1	Concanavalin A-like lectin protein kinase family protein	ResCul_Time0	ResCul_Time1D	0.0709689	0	-inf
		ResCul_Time0	ResCul_Time5D	0.0709689	7.93126	6.80422
		ResCul_Time1D	ResCul_Time5D	0	7.93126	inf
Phvul.001G042100.1	WRKY DNA-binding protein 40	ResCul_Time0	ResCul_Time1D	0	15.3393	inf
		ResCul_Time0	ResCul_Time5D	0	83.0801	inf
		ResCul_Time1D	ResCul_Time5D	15.3393	83.0801	2.43727
Phvul.001G047800.1	PR5-like receptor kinase	ResCul_Time0	ResCul_Time1D	0.704394	0	-inf
		ResCul_Time0	ResCul_Time5D	0.704394	6.25197	3.14986
		ResCul_Time1D	ResCul_Time5D	0	6.25197	inf
Phvul.001G048701.1	Protein kinase superfamily protein	ResCul_Time0	ResCul_Time1D	0	1.69165	inf
		ResCul_Time0	ResCul_Time5D	0	2.39223	inf
		ResCul_Time1D	ResCul_Time5D	1.69165	2.39223	0.499927
Phvul.001G048900.1	Protein kinase superfamily protein	ResCul_Time0	ResCul_Time1D	0	0.690323	inf
		ResCul_Time0	ResCul_Time5D	0	6.22949	inf
		ResCul_Time1D	ResCul_Time5D	0.690323	6.22949	3.17377
Phvul.001G066300.1	wall-associated kinase 2	ResCul_Time0	ResCul_Time1D	0	0.45275	inf
		ResCul_Time0	ResCul_Time5D	0	2.98428	inf
		ResCul_Time1D	ResCul_Time5D	0.45275	2.98428	2.72059
Phvul.001G070000.1	Protein kinase superfamily protein	ResCul_Time0	ResCul_Time1D	1.32154	0	-inf
		ResCul_Time0	ResCul_Time5D	1.32154	8.41882	2.67139
		ResCul_Time1D	ResCul_Time5D	0	8.41882	inf
Phvul.001G085200.1	CCR-like	ResCul_Time0	ResCul_Time1D	275.364	3049.52	3.46917
		ResCul_Time0	ResCul_Time5D	275.364	198.153	-0.474728
		ResCul_Time1D	ResCul_Time5D	3049.52	198.153	-3.9439
Phvul.001G091000.1	senescence-related gene 3	ResCul_Time0	ResCul_Time1D	51.0363	7.23521	-2.81842
		ResCul_Time0	ResCul_Time5D	51.0363	88.5517	0.794996
		ResCul_Time1D	ResCul_Time5D	7.23521	88.5517	3.61341
Phvul.001G097200.1	PEBP (phosphatidylethanolamine-binding protein) family protein	ResCul_Time0	ResCul_Time1D	10.8712	0	-inf
		ResCul_Time0	ResCul_Time5D	10.8712	15.8607	0.54495
		ResCul_Time1D	ResCul_Time5D	0	15.8607	inf
Phvul.001G117900.1	cytochrome P450, family 98, subfamily A, polypeptide 3	ResCul_Time0	ResCul_Time1D	13.4887	13.8208	0.0350826
		ResCul_Time0	ResCul_Time5D	13.4887	120.589	3.16027
		ResCul_Time1D	ResCul_Time5D	13.8208	120.589	3.12519
Phvul.001G145600.1	Disease resistance-responsive (dirigent-like protein) family protein	ResCul_Time0	ResCul_Time1D	0	2.43046	inf
		ResCul_Time0	ResCul_Time5D	0	25.9802	inf
		ResCul_Time1D	ResCul_Time5D	2.43046	25.9802	3.41811
Phvul.001G145700.1	Disease resistance-responsive (dirigent-like protein) family protein	ResCul_Time0	ResCul_Time1D	0.194735	0	-inf
		ResCul_Time0	ResCul_Time5D	0.194735	30.7696	7.30385
		ResCul_Time1D	ResCul_Time5D	0	30.7696	inf
Phvul.001G170800.2	C2H2 and C2HC zinc fingers superfamily protein	ResCul_Time0	ResCul_Time1D	0	0.238394	inf
		ResCul_Time0	ResCul_Time5D	0	42.3721	inf
		ResCul_Time1D	ResCul_Time5D	0.238394	42.3721	7.47362
Phvul.001G192000.1	NAC domain containing protein 90	ResCul_Time0	ResCul_Time1D	0	0.786402	inf
		ResCul_Time0	ResCul_Time5D	0	6.43816	inf
		ResCul_Time1D	ResCul_Time5D	0.786402	6.43816	3.03331
Phvul.001G231901.1		ResCul_Time0	ResCul_Time1D	21.0607	0	-inf
		ResCul_Time0	ResCul_Time5D	21.0607	12.9696	-0.699425
		ResCul_Time1D	ResCul_Time5D	0	12.9696	inf
Phvul.001G249600.1	RING-H2 finger A2A	ResCul_Time0	ResCul_Time1D	9.42613	0	-inf
		ResCul_Time0	ResCul_Time5D	9.42613	21.4888	1.18885
		ResCul_Time1D	ResCul_Time5D	0	21.4888	inf
Phvul.001G250300.1	Heavy metal transport/detoxification superfamily protein	ResCul_Time0	ResCul_Time1D	15.1419	0	-inf
		ResCul_Time0	ResCul_Time5D	15.1419	0	-inf
		ResCul_Time1D	ResCul_Time5D	0	0	0
Phvul.001G258200.1	heat shock protein 21	ResCul_Time0	ResCul_Time1D	703.868	34.9971	-4.33
		ResCul_Time0	ResCul_Time5D	703.868	365.449	-0.945634
		ResCul_Time1D	ResCul_Time5D	34.9971	365.449	3.38436
Phvul.002G004000.1	BON association protein 2	ResCul_Time0	ResCul_Time1D	0	0.551489	inf
		ResCul_Time0	ResCul_Time5D	0	40.2728	inf
		ResCul_Time1D	ResCul_Time5D	0.551489	40.2728	6.19033
Phvul.002G049500.1	cysteine-rich RLK (RECEPTOR-like protein kinase) 25	ResCul_Time0	ResCul_Time1D	13.2604	64.2103	2.27568
		ResCul_Time0	ResCul_Time5D	13.2604	133.173	3.3281
		ResCul_Time1D	ResCul_Time5D	64.2103	133.173	1.05242
Phvul.002G049700.1	Protein of unknown function (DUF1005)	ResCul_Time0	ResCul_Time1D	20.5532	190.754	3.21427
		ResCul_Time0	ResCul_Time5D	20.5532	29.3176	0.512402
		ResCul_Time1D	ResCul_Time5D	190.754	29.3176	-2.70187
Phvul.002G055800.1	ethylene responsive element binding factor 5	ResCul_Time0	ResCul_Time1D	7.62643	8.36126	0.132713
		ResCul_Time0	ResCul_Time5D	7.62643	114.906	3.9133
		ResCul_Time1D	ResCul_Time5D	8.36126	114.906	3.78059
Phvul.002G099300.1	ZPR1 zinc-finger domain protein	ResCul_Time0	ResCul_Time1D	12.1584	0	-inf
		ResCul_Time0	ResCul_Time5D	12.1584	11.9134	-0.0293645
		ResCul_Time1D	ResCul_Time5D	0	11.9134	inf
Phvul.002G128200.1	S-adenosyl-L-methionine-dependent methyltransferases superfamily protein	ResCul_Time0	ResCul_Time1D	4.68581	16.7178	1.83501
		ResCul_Time0	ResCul_Time5D	4.68581	0	-inf
		ResCul_Time1D	ResCul_Time5D	16.7178	0	-inf
Phvul.002G129566.1	LRR and NB-ARC domains-containing disease resistance protein	ResCul_Time0	ResCul_Time1D	5.12069	0	-inf
		ResCul_Time0	ResCul_Time5D	5.12069	9.00566	0.814494
		ResCul_Time1D	ResCul_Time5D	0	9.00566	inf
Phvul.002G129632.1	NB-ARC domain-containing disease resistance protein	ResCul_Time0	ResCul_Time1D	2.5919	0	-inf
		ResCul_Time0	ResCul_Time5D	2.5919	6.03013	1.21818
		ResCul_Time1D	ResCul_Time5D	0	6.03013	inf
Phvul.002G144600.1	elicitor-activated gene 3-2	ResCul_Time0	ResCul_Time1D	0	0.206252	inf
		ResCul_Time0	ResCul_Time5D	0	8.05929	inf
		ResCul_Time1D	ResCul_Time5D	0.206252	8.05929	5.28817
Phvul.002G146100.1	UDP-glucosyl transferase 85A2	ResCul_Time0	ResCul_Time1D	0.43919	3.77124	3.10212
		ResCul_Time0	ResCul_Time5D	0.43919	0	-inf
		ResCul_Time1D	ResCul_Time5D	3.77124	0	-inf
Phvul.002G152400.1	Subtilase family protein	ResCul_Time0	ResCul_Time1D	0.166427	0	-inf
		ResCul_Time0	ResCul_Time5D	0.166427	3.28704	4.30382
		ResCul_Time1D	ResCul_Time5D	0	3.28704	inf
Phvul.002G152700.1	leucoanthocyanidin dioxygenase	ResCul_Time0	ResCul_Time1D	9.99175	0	-inf
		ResCul_Time0	ResCul_Time5D	9.99175	3.44996	-1.53416
		ResCul_Time1D	ResCul_Time5D	0	3.44996	inf
Phvul.002G154600.1	MATE efflux family protein	ResCul_Time0	ResCul_Time1D	0	0	0
		ResCul_Time0	ResCul_Time5D	0	2.1733	inf
		ResCul_Time1D	ResCul_Time5D	0	2.1733	inf
Phvul.002G155500.1	osmotin 34	ResCul_Time0	ResCul_Time1D	163.84	264.103	0.688815
		ResCul_Time0	ResCul_Time5D	163.84	3350.15	4.35387
		ResCul_Time1D	ResCul_Time5D	264.103	3350.15	3.66505
Phvul.002G188800.1	lysm domain GPI-anchored protein 2 precursor	ResCul_Time0	ResCul_Time1D	25.5334	59.1442	1.21185
		ResCul_Time0	ResCul_Time5D	25.5334	282.428	3.46743
		ResCul_Time1D	ResCul_Time5D	59.1442	282.428	2.25558
Phvul.002G194800.1		ResCul_Time0	ResCul_Time1D	73.1027	157.764	1.10977
		ResCul_Time0	ResCul_Time5D	73.1027	18.4728	-1.98452
		ResCul_Time1D	ResCul_Time5D	157.764	18.4728	-3.09429
Phvul.002G207300.1	DNAJ-like 20	ResCul_Time0	ResCul_Time1D	0	2.03543	inf
		ResCul_Time0	ResCul_Time5D	0	9.45313	inf
		ResCul_Time1D	ResCul_Time5D	2.03543	9.45313	2.21546
Phvul.002G209400.1	MLP-like protein 423	ResCul_Time0	ResCul_Time1D	0	3.82778	inf
		ResCul_Time0	ResCul_Time5D	0	18.3451	inf
		ResCul_Time1D	ResCul_Time5D	3.82778	18.3451	2.26082
Phvul.002G210400.1	white-brown complex homolog protein 11	ResCul_Time0	ResCul_Time1D	9.44812	6.50087	-0.539394
		ResCul_Time0	ResCul_Time5D	9.44812	88.8064	3.23257
		ResCul_Time1D	ResCul_Time5D	6.50087	88.8064	3.77196
Phvul.002G263200.1	RING/FYVE/PHD zinc finger superfamily protein	ResCul_Time0	ResCul_Time1D	0	2.86305	inf
		ResCul_Time0	ResCul_Time5D	0	4.6583	inf
		ResCul_Time1D	ResCul_Time5D	2.86305	4.6583	0.70225
Phvul.002G285800.1	WRKY DNA-binding protein 75	ResCul_Time0	ResCul_Time1D	0	2.6145	inf
		ResCul_Time0	ResCul_Time5D	0	25.2553	inf
		ResCul_Time1D	ResCul_Time5D	2.6145	25.2553	3.27198
Phvul.002G286500.1	osmotin 34	ResCul_Time0	ResCul_Time1D	1.48119	58.7356	5.30941
		ResCul_Time0	ResCul_Time5D	1.48119	1002.95	9.40328
		ResCul_Time1D	ResCul_Time5D	58.7356	1002.95	4.09388
Phvul.002G286600.1	osmotin 34	ResCul_Time0	ResCul_Time1D	0	2.43234	inf
		ResCul_Time0	ResCul_Time5D	0	130.201	inf
		ResCul_Time1D	ResCul_Time5D	2.43234	130.201	5.74225
Phvul.002G289100.1	tubulin beta chain 2	ResCul_Time0	ResCul_Time1D	28.0974	168.826	2.58703
		ResCul_Time0	ResCul_Time5D	28.0974	8.15927	-1.78393
		ResCul_Time1D	ResCul_Time5D	168.826	8.15927	-4.37096
Phvul.002G300200.1	Glutaredoxin family protein	ResCul_Time0	ResCul_Time1D	382.89	28.1469	-3.76588
		ResCul_Time0	ResCul_Time5D	382.89	361.61	-0.0824939
		ResCul_Time1D	ResCul_Time5D	28.1469	361.61	3.68339
Phvul.002G305200.1	S-adenosyl-L-methionine-dependent methyltransferases superfamily protein	ResCul_Time0	ResCul_Time1D	29.2511	0	-inf
		ResCul_Time0	ResCul_Time5D	29.2511	10.2984	-1.50607
		ResCul_Time1D	ResCul_Time5D	0	10.2984	inf
Phvul.002G319000.1	PLANT CADMIUM RESISTANCE 2	ResCul_Time0	ResCul_Time1D	21.0391	514.405	4.61176
		ResCul_Time0	ResCul_Time5D	21.0391	178.662	3.08609
		ResCul_Time1D	ResCul_Time5D	514.405	178.662	-1.52567
Phvul.002G320500.1	nudix hydrolase homolog 17	ResCul_Time0	ResCul_Time1D	0	0	0
		ResCul_Time0	ResCul_Time5D	0	5.3801	inf
		ResCul_Time1D	ResCul_Time5D	0	5.3801	inf
Phvul.003G009200.1	cytochrome P450, family 71, subfamily B, polypeptide 35	ResCul_Time0	ResCul_Time1D	0.87394	0	-inf
		ResCul_Time0	ResCul_Time5D	0.87394	4.55798	2.38279
		ResCul_Time1D	ResCul_Time5D	0	4.55798	inf
Phvul.003G020300.1	2-oxoglutarate (2OG) and Fe(II)-dependent oxygenase superfamily protein	ResCul_Time0	ResCul_Time1D	171.65	37.1471	-2.20815
		ResCul_Time0	ResCul_Time5D	171.65	324.456	0.918552
		ResCul_Time1D	ResCul_Time5D	37.1471	324.456	3.1267
Phvul.003G022100.1	chlororespiratory reduction 3	ResCul_Time0	ResCul_Time1D	65.599	414.957	2.66122
		ResCul_Time0	ResCul_Time5D	65.599	11.6129	-2.49794
		ResCul_Time1D	ResCul_Time5D	414.957	11.6129	-5.15916
Phvul.003G022500.1		ResCul_Time0	ResCul_Time1D	0	6.53652	inf
		ResCul_Time0	ResCul_Time5D	0	50.5217	inf
		ResCul_Time1D	ResCul_Time5D	6.53652	50.5217	2.95031
Phvul.003G030601.1	VQ motif-containing protein	ResCul_Time0	ResCul_Time1D	0	0.540288	inf
		ResCul_Time0	ResCul_Time5D	0	21.4908	inf
		ResCul_Time1D	ResCul_Time5D	0.540288	21.4908	5.31385
Phvul.003G047900.1	S-adenosyl-L-methionine-dependent methyltransferases superfamily protein	ResCul_Time0	ResCul_Time1D	51.3435	39.5416	-0.37681
		ResCul_Time0	ResCul_Time5D	51.3435	457.719	3.15621
		ResCul_Time1D	ResCul_Time5D	39.5416	457.719	3.53302
Phvul.003G051700.1	cytochrome P450, family 93, subfamily D, polypeptide 1	ResCul_Time0	ResCul_Time1D	0	7.91731	inf
		ResCul_Time0	ResCul_Time5D	0	55.9777	inf
		ResCul_Time1D	ResCul_Time5D	7.91731	55.9777	2.82177
Phvul.003G085000.1	SCARECROW-like 13	ResCul_Time0	ResCul_Time1D	12.2101	9.00672	-0.438998
		ResCul_Time0	ResCul_Time5D	12.2101	100.056	3.03467
		ResCul_Time1D	ResCul_Time5D	9.00672	100.056	3.47366
Phvul.003G095400.1	alpha/beta-Hydrolases superfamily protein	ResCul_Time0	ResCul_Time1D	3.27577	21.0637	2.68486
		ResCul_Time0	ResCul_Time5D	3.27577	0	-inf
		ResCul_Time1D	ResCul_Time5D	21.0637	0	-inf
Phvul.003G098200.1	pyruvate orthophosphate dikinase	ResCul_Time0	ResCul_Time1D	128.387	5.8232	-4.46254
		ResCul_Time0	ResCul_Time5D	128.387	124.629	-0.0428551
		ResCul_Time1D	ResCul_Time5D	5.8232	124.629	4.41968
Phvul.003G104400.1	soybean gene regulated by cold-2	ResCul_Time0	ResCul_Time1D	0	13.6448	inf
		ResCul_Time0	ResCul_Time5D	0	90.1333	inf
		ResCul_Time1D	ResCul_Time5D	13.6448	90.1333	2.72371
Phvul.003G106200.1	Copper amine oxidase family protein	ResCul_Time0	ResCul_Time1D	1.72311	6.02583	1.80614
		ResCul_Time0	ResCul_Time5D	1.72311	0	-inf
		ResCul_Time1D	ResCul_Time5D	6.02583	0	-inf
Phvul.003G109100.1	MLP-like protein 423	ResCul_Time0	ResCul_Time1D	24.6101	298.232	3.59911
		ResCul_Time0	ResCul_Time5D	24.6101	1499.38	5.92897
		ResCul_Time1D	ResCul_Time5D	298.232	1499.38	2.32986
Phvul.003G126600.1	Plant invertase/pectin methylesterase inhibitor superfamily	ResCul_Time0	ResCul_Time1D	2.47478	0.0839359	-4.88187
		ResCul_Time0	ResCul_Time5D	2.47478	0	-inf
		ResCul_Time1D	ResCul_Time5D	0.0839359	0	-inf
Phvul.003G128133.1	flavin-dependent monooxygenase 1	ResCul_Time0	ResCul_Time1D	0	0.539044	inf
		ResCul_Time0	ResCul_Time5D	0	9.99554	inf
		ResCul_Time1D	ResCul_Time5D	0.539044	9.99554	4.21281
Phvul.003G131400.1	germin 3	ResCul_Time0	ResCul_Time1D	22.0401	567.701	4.68693
		ResCul_Time0	ResCul_Time5D	22.0401	5.77584	-1.93203
		ResCul_Time1D	ResCul_Time5D	567.701	5.77584	-6.61896
Phvul.003G142200.1	NAD(P)-binding Rossmann-fold superfamily protein	ResCul_Time0	ResCul_Time1D	4.32894	2.3247	-0.896967
		ResCul_Time0	ResCul_Time5D	4.32894	0	-inf
		ResCul_Time1D	ResCul_Time5D	2.3247	0	-inf
Phvul.003G146700.1	Galactosyltransferase family protein	ResCul_Time0	ResCul_Time1D	0	0.327486	inf
		ResCul_Time0	ResCul_Time5D	0	4.85113	inf
		ResCul_Time1D	ResCul_Time5D	0.327486	4.85113	3.88882
Phvul.003G158200.1	response regulator 12	ResCul_Time0	ResCul_Time1D	0.493896	0	-inf
		ResCul_Time0	ResCul_Time5D	0.493896	1.54918	1.64922
		ResCul_Time1D	ResCul_Time5D	0	1.54918	inf
Phvul.003G169100.1	Bifunctional inhibitor/lipid-transfer protein/seed storage 2S albumin superfamily protein	ResCul_Time0	ResCul_Time1D	144.122	315.945	1.13238
		ResCul_Time0	ResCul_Time5D	144.122	27.5857	-2.3853
		ResCul_Time1D	ResCul_Time5D	315.945	27.5857	-3.51768
Phvul.003G201400.2	Glucose-6-phosphate/phosphate translocator-related	ResCul_Time0	ResCul_Time1D	0.156512	0	-inf
		ResCul_Time0	ResCul_Time5D	0.156512	4.39762	4.81238
		ResCul_Time1D	ResCul_Time5D	0	4.39762	inf
Phvul.003G212800.2	C-repeat-binding factor 4	ResCul_Time0	ResCul_Time1D	0	0	0
		ResCul_Time0	ResCul_Time5D	0	18.0734	inf
		ResCul_Time1D	ResCul_Time5D	0	18.0734	inf
Phvul.003G212900.1		ResCul_Time0	ResCul_Time1D	0	0	0
		ResCul_Time0	ResCul_Time5D	0	2.40641	inf
		ResCul_Time1D	ResCul_Time5D	0	2.40641	inf
Phvul.003G217500.1	beta vacuolar processing enzyme	ResCul_Time0	ResCul_Time1D	15.5552	36.2399	1.22019
		ResCul_Time0	ResCul_Time5D	15.5552	129.563	3.05819
		ResCul_Time1D	ResCul_Time5D	36.2399	129.563	1.838
Phvul.003G237400.1	Late embryogenesis abundant protein, group 6	ResCul_Time0	ResCul_Time1D	150.057	9.11479	-4.04115
		ResCul_Time0	ResCul_Time5D	150.057	266.625	0.829306
		ResCul_Time1D	ResCul_Time5D	9.11479	266.625	4.87046
Phvul.003G248200.1	methyl esterase 1	ResCul_Time0	ResCul_Time1D	0.167896	10.9733	6.03029
		ResCul_Time0	ResCul_Time5D	0.167896	0	-inf
		ResCul_Time1D	ResCul_Time5D	10.9733	0	-inf
Phvul.003G292400.1	redox responsive transcription factor 1	ResCul_Time0	ResCul_Time1D	0	0.332318	inf
		ResCul_Time0	ResCul_Time5D	0	8.7314	inf
		ResCul_Time1D	ResCul_Time5D	0.332318	8.7314	4.71558
Phvul.003G295200.1	carboxyesterase 13	ResCul_Time0	ResCul_Time1D	2.22874	8.05813	1.85422
		ResCul_Time0	ResCul_Time5D	2.22874	211.682	6.56953
		ResCul_Time1D	ResCul_Time5D	8.05813	211.682	4.71531
Phvul.004G007100.1	Raffinose synthase family protein	ResCul_Time0	ResCul_Time1D	59.3065	3.91328	-3.92174
		ResCul_Time0	ResCul_Time5D	59.3065	28.1251	-1.07633
		ResCul_Time1D	ResCul_Time5D	3.91328	28.1251	2.84541
Phvul.004G009800.1	NB-ARC domain-containing disease resistance protein	ResCul_Time0	ResCul_Time1D	4.78962	0	-inf
		ResCul_Time0	ResCul_Time5D	4.78962	6.18706	0.369342
		ResCul_Time1D	ResCul_Time5D	0	6.18706	inf
Phvul.004G044200.2	Protein kinase superfamily protein	ResCul_Time0	ResCul_Time1D	3.19673	6.76809	1.08215
		ResCul_Time0	ResCul_Time5D	3.19673	0	-inf
		ResCul_Time1D	ResCul_Time5D	6.76809	0	-inf
Phvul.004G074700.1	PEBP (phosphatidylethanolamine-binding protein) family protein	ResCul_Time0	ResCul_Time1D	20.6336	0	-inf
		ResCul_Time0	ResCul_Time5D	20.6336	20.0437	-0.0418477
		ResCul_Time1D	ResCul_Time5D	0	20.0437	inf
Phvul.004G088400.1	Pyridoxal phosphate (PLP)-dependent transferases superfamily protein	ResCul_Time0	ResCul_Time1D	0	0.781544	inf
		ResCul_Time0	ResCul_Time5D	0	3.26195	inf
		ResCul_Time1D	ResCul_Time5D	0.781544	3.26195	2.06134
Phvul.004G090800.1	Peroxidase superfamily protein	ResCul_Time0	ResCul_Time1D	0.646435	0	-inf
		ResCul_Time0	ResCul_Time5D	0.646435	3.80366	2.55681
		ResCul_Time1D	ResCul_Time5D	0	3.80366	inf
Phvul.004G106700.1	Protein of unknown function (DUF3464)	ResCul_Time0	ResCul_Time1D	37.0608	234.816	2.66356
		ResCul_Time0	ResCul_Time5D	37.0608	14.1135	-1.39282
		ResCul_Time1D	ResCul_Time5D	234.816	14.1135	-4.05638
Phvul.004G106900.1	Heavy metal transport/detoxification superfamily protein	ResCul_Time0	ResCul_Time1D	17.1741	31.6025	0.879804
		ResCul_Time0	ResCul_Time5D	17.1741	355.961	4.37342
		ResCul_Time1D	ResCul_Time5D	31.6025	355.961	3.49361
Phvul.004G107700.1	heat shock protein 90.1	ResCul_Time0	ResCul_Time1D	68.0117	11.0575	-2.62076
		ResCul_Time0	ResCul_Time5D	68.0117	140.606	1.0478
		ResCul_Time1D	ResCul_Time5D	11.0575	140.606	3.66856
Phvul.004G114700.1	disease resistance family protein / LRR family protein	ResCul_Time0	ResCul_Time1D	0	0.0628111	inf
		ResCul_Time0	ResCul_Time5D	0	6.71699	inf
		ResCul_Time1D	ResCul_Time5D	0.0628111	6.71699	6.74065
Phvul.004G129900.1	Kunitz family trypsin and protease inhibitor protein	ResCul_Time0	ResCul_Time1D	0	8.85419	inf
		ResCul_Time0	ResCul_Time5D	0	0.815176	inf
		ResCul_Time1D	ResCul_Time5D	8.85419	0.815176	-3.44118
Phvul.004G142700.1	receptor like protein 13	ResCul_Time0	ResCul_Time1D	0	0.0422395	inf
		ResCul_Time0	ResCul_Time5D	0	1.44419	inf
		ResCul_Time1D	ResCul_Time5D	0.0422395	1.44419	5.09553
Phvul.004G147500.1	CYS, MET, PRO, and GLY protein 1	ResCul_Time0	ResCul_Time1D	0	0.231829	inf
		ResCul_Time0	ResCul_Time5D	0	2.18276	inf
		ResCul_Time1D	ResCul_Time5D	0.231829	2.18276	3.23502
Phvul.004G154950.1		ResCul_Time0	ResCul_Time1D	103.586	0	-inf
		ResCul_Time0	ResCul_Time5D	103.586	77.0971	-0.426076
		ResCul_Time1D	ResCul_Time5D	0	77.0971	inf
Phvul.004G155100.1	receptor serine/threonine kinase, putative	ResCul_Time0	ResCul_Time1D	0	0	0
		ResCul_Time0	ResCul_Time5D	0	11.9875	inf
		ResCul_Time1D	ResCul_Time5D	0	11.9875	inf
Phvul.004G175900.1	Protein kinase family protein with leucine-rich repeat domain	ResCul_Time0	ResCul_Time1D	5.67332	14.6665	1.37026
		ResCul_Time0	ResCul_Time5D	5.67332	75.7011	3.73805
		ResCul_Time1D	ResCul_Time5D	14.6665	75.7011	2.36779
Phvul.005G016400.1	alpha/beta-Hydrolases superfamily protein	ResCul_Time0	ResCul_Time1D	16.2486	129.014	2.98913
		ResCul_Time0	ResCul_Time5D	16.2486	231.376	3.83185
		ResCul_Time1D	ResCul_Time5D	129.014	231.376	0.842715
Phvul.005G024800.1	VQ motif-containing protein	ResCul_Time0	ResCul_Time1D	0	1.37137	inf
		ResCul_Time0	ResCul_Time5D	0	68.4635	inf
		ResCul_Time1D	ResCul_Time5D	1.37137	68.4635	5.64165
Phvul.005G061200.1	Arabidopsis thaliana gibberellin 2-oxidase 1	ResCul_Time0	ResCul_Time1D	0.599149	0	-inf
		ResCul_Time0	ResCul_Time5D	0.599149	16.2337	4.75993
		ResCul_Time1D	ResCul_Time5D	0	16.2337	inf
Phvul.005G071300.1	low-molecular-weight cysteine-rich 68	ResCul_Time0	ResCul_Time1D	0	0	0
		ResCul_Time0	ResCul_Time5D	0	16.0673	inf
		ResCul_Time1D	ResCul_Time5D	0	16.0673	inf
Phvul.005G074700.1	ethylene responsive element binding factor 4	ResCul_Time0	ResCul_Time1D	13.0456	6.89441	-0.92006
		ResCul_Time0	ResCul_Time5D	13.0456	174.184	3.73898
		ResCul_Time1D	ResCul_Time5D	6.89441	174.184	4.65904
Phvul.005G080300.1	WRKY DNA-binding protein 70	ResCul_Time0	ResCul_Time1D	0	0.792496	inf
		ResCul_Time0	ResCul_Time5D	0	10.3676	inf
		ResCul_Time1D	ResCul_Time5D	0.792496	10.3676	3.70953
Phvul.005G098533.1	Pentatricopeptide repeat (PPR) superfamily protein	ResCul_Time0	ResCul_Time1D	2.94386	0	-inf
		ResCul_Time0	ResCul_Time5D	2.94386	6.11227	1.054
		ResCul_Time1D	ResCul_Time5D	0	6.11227	inf
Phvul.005G108900.1	HXXXD-type acyl-transferase family protein	ResCul_Time0	ResCul_Time1D	0	0.742461	inf
		ResCul_Time0	ResCul_Time5D	0	9.01874	inf
		ResCul_Time1D	ResCul_Time5D	0.742461	9.01874	3.60254
Phvul.005G111300.1	xyloglucan endotransglucosylase/hydrolase 9	ResCul_Time0	ResCul_Time1D	68.8244	497.841	2.85469
		ResCul_Time0	ResCul_Time5D	68.8244	18.7414	-1.87669
		ResCul_Time1D	ResCul_Time5D	497.841	18.7414	-4.73138
Phvul.005G116200.1	cellulose synthase-like B4	ResCul_Time0	ResCul_Time1D	1.72737	65.7769	5.25093
		ResCul_Time0	ResCul_Time5D	1.72737	1.11242	-0.634879
		ResCul_Time1D	ResCul_Time5D	65.7769	1.11242	-5.88581
Phvul.005G160000.1	beta galactosidase 1	ResCul_Time0	ResCul_Time1D	128.968	25.7174	-2.3262
		ResCul_Time0	ResCul_Time5D	128.968	16.0808	-3.0036
		ResCul_Time1D	ResCul_Time5D	25.7174	16.0808	-0.677405
Phvul.005G163100.1	Leucine-rich repeat protein kinase family protein	ResCul_Time0	ResCul_Time1D	0	0.102182	inf
		ResCul_Time0	ResCul_Time5D	0	2.86824	inf
		ResCul_Time1D	ResCul_Time5D	0.102182	2.86824	4.81096
Phvul.005G171900.1	Coatomer, beta\' subunit	ResCul_Time0	ResCul_Time1D	0	1.14293	inf
		ResCul_Time0	ResCul_Time5D	0	13.0008	inf
		ResCul_Time1D	ResCul_Time5D	1.14293	13.0008	3.50779
Phvul.006G016900.1	lipoxygenase 2	ResCul_Time0	ResCul_Time1D	3.58223	6.22793	0.797897
		ResCul_Time0	ResCul_Time5D	3.58223	50.277	3.81097
		ResCul_Time1D	ResCul_Time5D	6.22793	50.277	3.01307
Phvul.006G023500.1	glutathione S-transferase PHI 9	ResCul_Time0	ResCul_Time1D	12.3587	0	-inf
		ResCul_Time0	ResCul_Time5D	12.3587	30.0547	1.28206
		ResCul_Time1D	ResCul_Time5D	0	30.0547	inf
Phvul.006G038144.1	ATP binding;GTP binding;nucleotide binding;nucleoside-triphosphatases	ResCul_Time0	ResCul_Time1D	0	0.619105	inf
		ResCul_Time0	ResCul_Time5D	0	5.86823	inf
		ResCul_Time1D	ResCul_Time5D	0.619105	5.86823	3.24467
Phvul.006G040800.1	fatty acid desaturase A	ResCul_Time0	ResCul_Time1D	157.231	8.25161	-4.25206
		ResCul_Time0	ResCul_Time5D	157.231	104.041	-0.595736
		ResCul_Time1D	ResCul_Time5D	8.25161	104.041	3.65633
Phvul.006G046000.1	heat shock protein 21	ResCul_Time0	ResCul_Time1D	290.178	34.1965	-3.08502
		ResCul_Time0	ResCul_Time5D	290.178	18.5635	-3.9664
		ResCul_Time1D	ResCul_Time5D	34.1965	18.5635	-0.881378
Phvul.006G065300.1	thiaminC	ResCul_Time0	ResCul_Time1D	6.12507	393.32	6.00483
		ResCul_Time0	ResCul_Time5D	6.12507	5.43645	-0.172062
		ResCul_Time1D	ResCul_Time5D	393.32	5.43645	-6.1769
Phvul.006G075600.1	Peroxidase superfamily protein	ResCul_Time0	ResCul_Time1D	0.138725	0	-inf
		ResCul_Time0	ResCul_Time5D	0.138725	6.44822	5.5386
		ResCul_Time1D	ResCul_Time5D	0	6.44822	inf
Phvul.006G078300.1	Bifunctional inhibitor/lipid-transfer protein/seed storage 2S albumin superfamily protein	ResCul_Time0	ResCul_Time1D	0	1.94316	inf
		ResCul_Time0	ResCul_Time5D	0	132.405	inf
		ResCul_Time1D	ResCul_Time5D	1.94316	132.405	6.09042
Phvul.006G079000.1	non-specific phospholipase C1	ResCul_Time0	ResCul_Time1D	11.3639	0	-inf
		ResCul_Time0	ResCul_Time5D	11.3639	11.7596	0.0493808
		ResCul_Time1D	ResCul_Time5D	0	11.7596	inf
Phvul.006G079700.1	cinnamate-4-hydroxylase	ResCul_Time0	ResCul_Time1D	0	0.362198	inf
		ResCul_Time0	ResCul_Time5D	0	4.97204	inf
		ResCul_Time1D	ResCul_Time5D	0.362198	4.97204	3.77899
Phvul.006G087500.1	glutathione S-transferase F11	ResCul_Time0	ResCul_Time1D	14.24	0	-inf
		ResCul_Time0	ResCul_Time5D	14.24	3.0566	-2.21995
		ResCul_Time1D	ResCul_Time5D	0	3.0566	inf
Phvul.006G102200.1	pathogenesis-related 4	ResCul_Time0	ResCul_Time1D	16.2165	59.6738	1.87964
		ResCul_Time0	ResCul_Time5D	16.2165	535.814	5.0462
		ResCul_Time1D	ResCul_Time5D	59.6738	535.814	3.16656
Phvul.006G102300.1	pathogenesis-related 4	ResCul_Time0	ResCul_Time1D	9.41887	24.7581	1.39427
		ResCul_Time0	ResCul_Time5D	9.41887	349.568	5.21388
		ResCul_Time1D	ResCul_Time5D	24.7581	349.568	3.8196
Phvul.006G107900.1	senescence-associated gene 21	ResCul_Time0	ResCul_Time1D	66.8621	40.1479	-0.735865
		ResCul_Time0	ResCul_Time5D	66.8621	864.373	3.69239
		ResCul_Time1D	ResCul_Time5D	40.1479	864.373	4.42826
Phvul.006G112200.1	cyclic nucleotide gated channel 1	ResCul_Time0	ResCul_Time1D	4.98966	23.6698	2.24604
		ResCul_Time0	ResCul_Time5D	4.98966	67.1999	3.75145
		ResCul_Time1D	ResCul_Time5D	23.6698	67.1999	1.50541
Phvul.006G133200.1	Leucine-rich repeat protein kinase family protein	ResCul_Time0	ResCul_Time1D	0	0.0470091	inf
		ResCul_Time0	ResCul_Time5D	0	6.00523	inf
		ResCul_Time1D	ResCul_Time5D	0.0470091	6.00523	6.99714
Phvul.006G133600.1	ferric reduction oxidase 7	ResCul_Time0	ResCul_Time1D	673.265	24.9083	-4.75648
		ResCul_Time0	ResCul_Time5D	673.265	269.351	-1.32168
		ResCul_Time1D	ResCul_Time5D	24.9083	269.351	3.43479
Phvul.006G146300.1	Chaperonin-like RbcX protein	ResCul_Time0	ResCul_Time1D	0.50263	26.0312	5.6946
		ResCul_Time0	ResCul_Time5D	0.50263	0	-inf
		ResCul_Time1D	ResCul_Time5D	26.0312	0	-inf
Phvul.006G161200.1	beta-amylase 3	ResCul_Time0	ResCul_Time1D	363.933	36.6228	-3.31286
		ResCul_Time0	ResCul_Time5D	363.933	221.734	-0.714842
		ResCul_Time1D	ResCul_Time5D	36.6228	221.734	2.59802
Phvul.006G174000.1		ResCul_Time0	ResCul_Time1D	6.92518	0	-inf
		ResCul_Time0	ResCul_Time5D	6.92518	10.2337	0.563403
		ResCul_Time1D	ResCul_Time5D	0	10.2337	inf
Phvul.006G183100.1	erf domain protein 9	ResCul_Time0	ResCul_Time1D	5.09017	6.95291	0.449903
		ResCul_Time0	ResCul_Time5D	5.09017	208.376	5.35533
		ResCul_Time1D	ResCul_Time5D	6.95291	208.376	4.90543
Phvul.006G188400.1	Aluminium induced protein with YGL and LRDR motifs	ResCul_Time0	ResCul_Time1D	132.724	121.739	-0.124636
		ResCul_Time0	ResCul_Time5D	132.724	11.9921	-3.46827
		ResCul_Time1D	ResCul_Time5D	121.739	11.9921	-3.34364
Phvul.006G196900.1	basic pathogenesis-related protein 1	ResCul_Time0	ResCul_Time1D	21.7141	180.857	3.05814
		ResCul_Time0	ResCul_Time5D	21.7141	4337.32	7.64203
		ResCul_Time1D	ResCul_Time5D	180.857	4337.32	4.58389
Phvul.006G200100.1	oligopeptide transporter 4	ResCul_Time0	ResCul_Time1D	0	0.385866	inf
		ResCul_Time0	ResCul_Time5D	0	1.89655	inf
		ResCul_Time1D	ResCul_Time5D	0.385866	1.89655	2.2972
Phvul.007G001200.1		ResCul_Time0	ResCul_Time1D	3.3089	0	-inf
		ResCul_Time0	ResCul_Time5D	3.3089	0.158611	-4.38279
		ResCul_Time1D	ResCul_Time5D	0	0.158611	inf
Phvul.007G013500.1	Aluminium activated malate transporter family protein	ResCul_Time0	ResCul_Time1D	3.56653	0	-inf
		ResCul_Time0	ResCul_Time5D	3.56653	0	-inf
		ResCul_Time1D	ResCul_Time5D	0	0	0
Phvul.007G021100.2	Tetratricopeptide repeat (TPR)-like superfamily protein	ResCul_Time0	ResCul_Time1D	0.414118	29.6873	6.16366
		ResCul_Time0	ResCul_Time5D	0.414118	0	-inf
		ResCul_Time1D	ResCul_Time5D	29.6873	0	-inf
Phvul.007G031000.1	Protein kinase superfamily protein	ResCul_Time0	ResCul_Time1D	0	0	0
		ResCul_Time0	ResCul_Time5D	0	1.90265	inf
		ResCul_Time1D	ResCul_Time5D	0	1.90265	inf
Phvul.007G040900.1	Plant basic secretory protein (BSP) family protein	ResCul_Time0	ResCul_Time1D	4.06618	35.7652	3.13681
		ResCul_Time0	ResCul_Time5D	4.06618	622.66	7.25863
		ResCul_Time1D	ResCul_Time5D	35.7652	622.66	4.12182
Phvul.007G046700.1		ResCul_Time0	ResCul_Time1D	0.643288	3.9949	2.63462
		ResCul_Time0	ResCul_Time5D	0.643288	0	-inf
		ResCul_Time1D	ResCul_Time5D	3.9949	0	-inf
Phvul.007G049700.1	cysteine-rich RLK (RECEPTOR-like protein kinase) 29	ResCul_Time0	ResCul_Time1D	0	0	0
		ResCul_Time0	ResCul_Time5D	0	8.34021	inf
		ResCul_Time1D	ResCul_Time5D	0	8.34021	inf
Phvul.007G051100.1	cysteine-rich RLK (RECEPTOR-like protein kinase) 25	ResCul_Time0	ResCul_Time1D	0.88473	0	-inf
		ResCul_Time0	ResCul_Time5D	0.88473	2.26353	1.35527
		ResCul_Time1D	ResCul_Time5D	0	2.26353	inf
Phvul.007G052900.1	thiazole biosynthetic enzyme, chloroplast (ARA6) (THI1) (THI4)	ResCul_Time0	ResCul_Time1D	343.377	4082.07	3.57144
		ResCul_Time0	ResCul_Time5D	343.377	100.1	-1.77835
		ResCul_Time1D	ResCul_Time5D	4082.07	100.1	-5.34978
Phvul.007G066500.1	Integrase-type DNA-binding superfamily protein	ResCul_Time0	ResCul_Time1D	0	0.490483	inf
		ResCul_Time0	ResCul_Time5D	0	73.2293	inf
		ResCul_Time1D	ResCul_Time5D	0.490483	73.2293	7.22207
Phvul.007G080200.1	Protein of unknown function (DUF793)	ResCul_Time0	ResCul_Time1D	8.51039	7.65551	-0.152727
		ResCul_Time0	ResCul_Time5D	8.51039	79.1923	3.21806
		ResCul_Time1D	ResCul_Time5D	7.65551	79.1923	3.37079
Phvul.007G087500.1	disease resistance family protein / LRR family protein	ResCul_Time0	ResCul_Time1D	0.610178	0	-inf
		ResCul_Time0	ResCul_Time5D	0.610178	23.0608	5.24007
		ResCul_Time1D	ResCul_Time5D	0	23.0608	inf
Phvul.007G104900.1	Duplicated homeodomain-like superfamily protein	ResCul_Time0	ResCul_Time1D	3.01525	0	-inf
		ResCul_Time0	ResCul_Time5D	3.01525	0.484373	-2.63809
		ResCul_Time1D	ResCul_Time5D	0	0.484373	inf
Phvul.007G110600.1	EXORDIUM like 5	ResCul_Time0	ResCul_Time1D	33.1367	260.824	2.97657
		ResCul_Time0	ResCul_Time5D	33.1367	16.9066	-0.970847
		ResCul_Time1D	ResCul_Time5D	260.824	16.9066	-3.94742
Phvul.007G123958.1	Six-hairpin glycosidases superfamily protein	ResCul_Time0	ResCul_Time1D	0.116332	0	-inf
		ResCul_Time0	ResCul_Time5D	0.116332	1.91505	4.04107
		ResCul_Time1D	ResCul_Time5D	0	1.91505	inf
Phvul.007G127800.1	ethylene response factor 1	ResCul_Time0	ResCul_Time1D	18.3131	19.3158	0.0769044
		ResCul_Time0	ResCul_Time5D	18.3131	331.041	4.17606
		ResCul_Time1D	ResCul_Time5D	19.3158	331.041	4.09916
Phvul.007G147500.1		ResCul_Time0	ResCul_Time1D	214.364	18.6084	-3.52604
		ResCul_Time0	ResCul_Time5D	214.364	107.765	-0.992179
		ResCul_Time1D	ResCul_Time5D	18.6084	107.765	2.53386
Phvul.007G150700.1	RNA-binding (RRM/RBD/RNP motifs) family protein	ResCul_Time0	ResCul_Time1D	96.2703	680.397	2.82121
		ResCul_Time0	ResCul_Time5D	96.2703	55.1583	-0.803514
		ResCul_Time1D	ResCul_Time5D	680.397	55.1583	-3.62473
Phvul.007G213500.1	Plant invertase/pectin methylesterase inhibitor superfamily protein	ResCul_Time0	ResCul_Time1D	0	9.95176	inf
		ResCul_Time0	ResCul_Time5D	0	0	0
		ResCul_Time1D	ResCul_Time5D	9.95176	0	-inf
Phvul.007G217800.1	ethylene-responsive element binding protein	ResCul_Time0	ResCul_Time1D	2.18329	0	-inf
		ResCul_Time0	ResCul_Time5D	2.18329	3.42973	0.651589
		ResCul_Time1D	ResCul_Time5D	0	3.42973	inf
Phvul.007G220400.1		ResCul_Time0	ResCul_Time1D	0	6.90297	inf
		ResCul_Time0	ResCul_Time5D	0	18.2826	inf
		ResCul_Time1D	ResCul_Time5D	6.90297	18.2826	1.40519
Phvul.007G222500.1	C-repeat/DRE binding factor 1	ResCul_Time0	ResCul_Time1D	0	10.0743	inf
		ResCul_Time0	ResCul_Time5D	0	2.30692	inf
		ResCul_Time1D	ResCul_Time5D	10.0743	2.30692	-2.12664
Phvul.007G241600.1	Integrase-type DNA-binding superfamily protein	ResCul_Time0	ResCul_Time1D	40.5337	55.382	0.450295
		ResCul_Time0	ResCul_Time5D	40.5337	419.355	3.37098
		ResCul_Time1D	ResCul_Time5D	55.382	419.355	2.92068
Phvul.007G254700.1	NB-ARC domain-containing disease resistance protein	ResCul_Time0	ResCul_Time1D	0	0.273568	inf
		ResCul_Time0	ResCul_Time5D	0	2.38694	inf
		ResCul_Time1D	ResCul_Time5D	0.273568	2.38694	3.12519
Phvul.007G277000.2		ResCul_Time0	ResCul_Time1D	2.27543	6.58842	1.53379
		ResCul_Time0	ResCul_Time5D	2.27543	0	-inf
		ResCul_Time1D	ResCul_Time5D	6.58842	0	-inf
Phvul.008G011400.1	heat shock protein 70	ResCul_Time0	ResCul_Time1D	0	0.62783	inf
		ResCul_Time0	ResCul_Time5D	0	3.06098	inf
		ResCul_Time1D	ResCul_Time5D	0.62783	3.06098	2.28555
Phvul.008G029700.1	Malectin/receptor-like protein kinase family protein	ResCul_Time0	ResCul_Time1D	3.52751	0	-inf
		ResCul_Time0	ResCul_Time5D	3.52751	33.9	3.26457
		ResCul_Time1D	ResCul_Time5D	0	33.9	inf
Phvul.008G029932.1	Malectin/receptor-like protein kinase family protein	ResCul_Time0	ResCul_Time1D	0.303901	0	-inf
		ResCul_Time0	ResCul_Time5D	0.303901	26.9928	6.47283
		ResCul_Time1D	ResCul_Time5D	0	26.9928	inf
Phvul.008G034000.1	UDP-Glycosyltransferase superfamily protein	ResCul_Time0	ResCul_Time1D	0	0.25213	inf
		ResCul_Time0	ResCul_Time5D	0	5.06019	inf
		ResCul_Time1D	ResCul_Time5D	0.25213	5.06019	4.32695
Phvul.008G044400.1	Leucine-rich repeat receptor-like protein kinase family protein	ResCul_Time0	ResCul_Time1D	0	0.156045	inf
		ResCul_Time0	ResCul_Time5D	0	4.71256	inf
		ResCul_Time1D	ResCul_Time5D	0.156045	4.71256	4.91648
Phvul.008G044600.1	Leucine-rich repeat receptor-like protein kinase family protein	ResCul_Time0	ResCul_Time1D	0	0.550096	inf
		ResCul_Time0	ResCul_Time5D	0	3.6104	inf
		ResCul_Time1D	ResCul_Time5D	0.550096	3.6104	2.71441
Phvul.008G044701.1	Leucine-rich repeat receptor-like protein kinase family protein	ResCul_Time0	ResCul_Time1D	0	0.761024	inf
		ResCul_Time0	ResCul_Time5D	0	14.509	inf
		ResCul_Time1D	ResCul_Time5D	0.761024	14.509	4.25286
Phvul.008G071300.3	NB-ARC domain-containing disease resistance protein	ResCul_Time0	ResCul_Time1D	12.787	31.8615	1.31714
		ResCul_Time0	ResCul_Time5D	12.787	2.26359	-2.49799
		ResCul_Time1D	ResCul_Time5D	31.8615	2.26359	-3.81513
Phvul.008G075000.1	FASCICLIN-like arabinogalactan-protein 10	ResCul_Time0	ResCul_Time1D	78.4243	413.618	2.39893
		ResCul_Time0	ResCul_Time5D	78.4243	36.8934	-1.08794
		ResCul_Time1D	ResCul_Time5D	413.618	36.8934	-3.48686
Phvul.008G080000.2	Leucine-rich repeat protein kinase family protein	ResCul_Time0	ResCul_Time1D	0	0.520374	inf
		ResCul_Time0	ResCul_Time5D	0	3.69091	inf
		ResCul_Time1D	ResCul_Time5D	0.520374	3.69091	2.82636
Phvul.008G081800.1	WRKY DNA-binding protein 70	ResCul_Time0	ResCul_Time1D	12.6707	81.3131	2.68199
		ResCul_Time0	ResCul_Time5D	12.6707	418.477	5.04558
		ResCul_Time1D	ResCul_Time5D	81.3131	418.477	2.36359
Phvul.008G086800.1	Peroxidase superfamily protein	ResCul_Time0	ResCul_Time1D	0.694416	0	-inf
		ResCul_Time0	ResCul_Time5D	0.694416	22.8146	5.03802
		ResCul_Time1D	ResCul_Time5D	0	22.8146	inf
Phvul.008G086900.1	Peroxidase superfamily protein	ResCul_Time0	ResCul_Time1D	0	0	0
		ResCul_Time0	ResCul_Time5D	0	12.9394	inf
		ResCul_Time1D	ResCul_Time5D	0	12.9394	inf
Phvul.008G088700.2	Protein of unknown function (DUF567)	ResCul_Time0	ResCul_Time1D	0	2.80976	inf
		ResCul_Time0	ResCul_Time5D	0	22.6129	inf
		ResCul_Time1D	ResCul_Time5D	2.80976	22.6129	3.00863
Phvul.008G116600.1	NAD(P)-binding Rossmann-fold superfamily protein	ResCul_Time0	ResCul_Time1D	4.51551	5.12833	0.1836
		ResCul_Time0	ResCul_Time5D	4.51551	0	-inf
		ResCul_Time1D	ResCul_Time5D	5.12833	0	-inf
Phvul.008G127237.1	S-locus lectin protein kinase family protein	ResCul_Time0	ResCul_Time1D	2.71188	0	-inf
		ResCul_Time0	ResCul_Time5D	2.71188	5.00736	0.884756
		ResCul_Time1D	ResCul_Time5D	0	5.00736	inf
Phvul.008G139900.1		ResCul_Time0	ResCul_Time1D	10.369	119.409	3.52556
		ResCul_Time0	ResCul_Time5D	10.369	1768.17	7.41384
		ResCul_Time1D	ResCul_Time5D	119.409	1768.17	3.88828
Phvul.008G140113.1		ResCul_Time0	ResCul_Time1D	0	13.4321	inf
		ResCul_Time0	ResCul_Time5D	0	251.676	inf
		ResCul_Time1D	ResCul_Time5D	13.4321	251.676	4.22781
Phvul.008G141500.10	SNF2 domain-containing protein / helicase domain-containing protein	ResCul_Time0	ResCul_Time1D	0.241062	2.0081	3.05836
		ResCul_Time0	ResCul_Time5D	0.241062	0	-inf
		ResCul_Time1D	ResCul_Time5D	2.0081	0	-inf
Phvul.008G144700.1	LOB domain-containing protein 25	ResCul_Time0	ResCul_Time1D	24.0899	0	-inf
		ResCul_Time0	ResCul_Time5D	24.0899	0.765359	-4.97615
		ResCul_Time1D	ResCul_Time5D	0	0.765359	inf
Phvul.008G166700.3	putative protein kinase 1	ResCul_Time0	ResCul_Time1D	0.936976	2.33498	1.31733
		ResCul_Time0	ResCul_Time5D	0.936976	0	-inf
		ResCul_Time1D	ResCul_Time5D	2.33498	0	-inf
Phvul.008G167800.1	O-methyltransferase family protein	ResCul_Time0	ResCul_Time1D	0	11.1342	inf
		ResCul_Time0	ResCul_Time5D	0	0	0
		ResCul_Time1D	ResCul_Time5D	11.1342	0	-inf
Phvul.008G169600.1	AGD2-like defense response protein 1	ResCul_Time0	ResCul_Time1D	0	0.0888773	inf
		ResCul_Time0	ResCul_Time5D	0	22.4115	inf
		ResCul_Time1D	ResCul_Time5D	0.0888773	22.4115	7.97821
Phvul.008G175300.1	UDP-glucosyl transferase 85A2	ResCul_Time0	ResCul_Time1D	0.655274	17.4212	4.73261
		ResCul_Time0	ResCul_Time5D	0.655274	0	-inf
		ResCul_Time1D	ResCul_Time5D	17.4212	0	-inf
Phvul.008G175500.1	UDP-glucosyl transferase 85A2	ResCul_Time0	ResCul_Time1D	0.089345	10.7804	6.9148
		ResCul_Time0	ResCul_Time5D	0.089345	0	-inf
		ResCul_Time1D	ResCul_Time5D	10.7804	0	-inf
Phvul.008G178100.1	2-oxoglutarate (2OG) and Fe(II)-dependent oxygenase superfamily protein	ResCul_Time0	ResCul_Time1D	3.34804	21.6408	2.69236
		ResCul_Time0	ResCul_Time5D	3.34804	0	-inf
		ResCul_Time1D	ResCul_Time5D	21.6408	0	-inf
Phvul.008G179700.1		ResCul_Time0	ResCul_Time1D	11097.4	3439.57	-1.68992
		ResCul_Time0	ResCul_Time5D	11097.4	29278.6	1.39962
		ResCul_Time1D	ResCul_Time5D	3439.57	29278.6	3.08955
Phvul.008G185800.1	WRKY DNA-binding protein 70	ResCul_Time0	ResCul_Time1D	0	0.517435	inf
		ResCul_Time0	ResCul_Time5D	0	15.4107	inf
		ResCul_Time1D	ResCul_Time5D	0.517435	15.4107	4.89641
Phvul.008G205600.2	protein kinase 2A	ResCul_Time0	ResCul_Time1D	0.947263	0	-inf
		ResCul_Time0	ResCul_Time5D	0.947263	3.57029	1.9142
		ResCul_Time1D	ResCul_Time5D	0	3.57029	inf
Phvul.008G207300.1	Late embryogenesis abundant (LEA) hydroxyproline-rich glycoprotein family	ResCul_Time0	ResCul_Time1D	4.11977	17.3836	2.07709
		ResCul_Time0	ResCul_Time5D	4.11977	158.531	5.26606
		ResCul_Time1D	ResCul_Time5D	17.3836	158.531	3.18897
Phvul.008G209214.1		ResCul_Time0	ResCul_Time1D	0	9.08849	inf
		ResCul_Time0	ResCul_Time5D	0	0	0
		ResCul_Time1D	ResCul_Time5D	9.08849	0	-inf
Phvul.008G225500.1	ortholog of sugar beet HS1 PRO-1 2	ResCul_Time0	ResCul_Time1D	3.26692	9.0478	1.46964
		ResCul_Time0	ResCul_Time5D	3.26692	126.123	5.27075
		ResCul_Time1D	ResCul_Time5D	9.0478	126.123	3.80112
Phvul.008G228000.1	HSP20-like chaperones superfamily protein	ResCul_Time0	ResCul_Time1D	24.4869	0	-inf
		ResCul_Time0	ResCul_Time5D	24.4869	3.57935	-2.77424
		ResCul_Time1D	ResCul_Time5D	0	3.57935	inf
Phvul.008G228700.2	subtilase family protein	ResCul_Time0	ResCul_Time1D	0.288956	0	-inf
		ResCul_Time0	ResCul_Time5D	0.288956	60.2323	7.70354
		ResCul_Time1D	ResCul_Time5D	0	60.2323	inf
Phvul.008G229400.1	Subtilisin-like serine endopeptidase family protein	ResCul_Time0	ResCul_Time1D	8.68614	325.315	5.22698
		ResCul_Time0	ResCul_Time5D	8.68614	120.787	3.79761
		ResCul_Time1D	ResCul_Time5D	325.315	120.787	-1.42937
Phvul.008G232700.1	Calcium-dependent lipid-binding (CaLB domain) family protein	ResCul_Time0	ResCul_Time1D	0	0.215953	inf
		ResCul_Time0	ResCul_Time5D	0	18.4687	inf
		ResCul_Time1D	ResCul_Time5D	0.215953	18.4687	6.41822
Phvul.008G236500.1	myb domain protein 20	ResCul_Time0	ResCul_Time1D	0.112915	0	-inf
		ResCul_Time0	ResCul_Time5D	0.112915	32.7566	8.18041
		ResCul_Time1D	ResCul_Time5D	0	32.7566	inf
Phvul.008G257300.1	CCT motif family protein	ResCul_Time0	ResCul_Time1D	0	53.3727	inf
		ResCul_Time0	ResCul_Time5D	0	0.154583	inf
		ResCul_Time1D	ResCul_Time5D	53.3727	0.154583	-8.43158
Phvul.008G259800.1	Protein phosphatase 2C family protein	ResCul_Time0	ResCul_Time1D	8.70376	8.04635	-0.113305
		ResCul_Time0	ResCul_Time5D	8.70376	162.477	4.22245
		ResCul_Time1D	ResCul_Time5D	8.04635	162.477	4.33576
Phvul.008G265300.1	Ras-related small GTP-binding family protein	ResCul_Time0	ResCul_Time1D	2.37304	0	-inf
		ResCul_Time0	ResCul_Time5D	2.37304	7.03679	1.56818
		ResCul_Time1D	ResCul_Time5D	0	7.03679	inf
Phvul.008G282200.1	Copper transport protein family	ResCul_Time0	ResCul_Time1D	1.3897	0	-inf
		ResCul_Time0	ResCul_Time5D	1.3897	11.597	3.06091
		ResCul_Time1D	ResCul_Time5D	0	11.597	inf
Phvul.008G282300.1	Copper transport protein family	ResCul_Time0	ResCul_Time1D	0	1.28415	inf
		ResCul_Time0	ResCul_Time5D	0	45.0284	inf
		ResCul_Time1D	ResCul_Time5D	1.28415	45.0284	5.13195
Phvul.008G287300.1	NAD(P)-linked oxidoreductase superfamily protein	ResCul_Time0	ResCul_Time1D	0	4.45857	inf
		ResCul_Time0	ResCul_Time5D	0	64.2406	inf
		ResCul_Time1D	ResCul_Time5D	4.45857	64.2406	3.84883
Phvul.008G287500.1		ResCul_Time0	ResCul_Time1D	11.6591	0.65258	-4.15915
		ResCul_Time0	ResCul_Time5D	11.6591	0	-inf
		ResCul_Time1D	ResCul_Time5D	0.65258	0	-inf
Phvul.009G001500.1	SAUR-like auxin-responsive protein family	ResCul_Time0	ResCul_Time1D	15.3813	0	-inf
		ResCul_Time0	ResCul_Time5D	15.3813	0.883913	-4.12113
		ResCul_Time1D	ResCul_Time5D	0	0.883913	inf
Phvul.009G001800.1	SAUR-like auxin-responsive protein family	ResCul_Time0	ResCul_Time1D	2.68577	0	-inf
		ResCul_Time0	ResCul_Time5D	2.68577	28.0265	3.38338
		ResCul_Time1D	ResCul_Time5D	0	28.0265	inf
Phvul.009G019400.1	DC1 domain-containing protein	ResCul_Time0	ResCul_Time1D	88.7347	10.7284	-3.04807
		ResCul_Time0	ResCul_Time5D	88.7347	224.055	1.33628
		ResCul_Time1D	ResCul_Time5D	10.7284	224.055	4.38435
Phvul.009G043200.2	WRKY DNA-binding protein 55	ResCul_Time0	ResCul_Time1D	0	0	0
		ResCul_Time0	ResCul_Time5D	0	2.8901	inf
		ResCul_Time1D	ResCul_Time5D	0	2.8901	inf
Phvul.009G044600.1	2-oxoglutarate (2OG) and Fe(II)-dependent oxygenase superfamily protein	ResCul_Time0	ResCul_Time1D	1.36704	13.9988	3.35617
		ResCul_Time0	ResCul_Time5D	1.36704	241.028	7.462
		ResCul_Time1D	ResCul_Time5D	13.9988	241.028	4.10583
Phvul.009G046600.1	Leucine-rich repeat protein kinase family protein	ResCul_Time0	ResCul_Time1D	0.309884	2.14214	2.78925
		ResCul_Time0	ResCul_Time5D	0.309884	0	-inf
		ResCul_Time1D	ResCul_Time5D	2.14214	0	-inf
Phvul.009G048400.1	Rhodanese/Cell cycle control phosphatase superfamily protein	ResCul_Time0	ResCul_Time1D	94.426	334.417	1.82439
		ResCul_Time0	ResCul_Time5D	94.426	33.0895	-1.51281
		ResCul_Time1D	ResCul_Time5D	334.417	33.0895	-3.33721
Phvul.009G062700.1	myb domain protein 77	ResCul_Time0	ResCul_Time1D	0	6.2691	inf
		ResCul_Time0	ResCul_Time5D	0	7.41432	inf
		ResCul_Time1D	ResCul_Time5D	6.2691	7.41432	0.242055
Phvul.009G070800.1	salt tolerance zinc finger	ResCul_Time0	ResCul_Time1D	15.5067	20.3502	0.392148
		ResCul_Time0	ResCul_Time5D	15.5067	561.557	5.17847
		ResCul_Time1D	ResCul_Time5D	20.3502	561.557	4.78632
Phvul.009G083500.1	Protein of unknown function (DUF1677)	ResCul_Time0	ResCul_Time1D	45.0002	154.298	1.77772
		ResCul_Time0	ResCul_Time5D	45.0002	11.7347	-1.93915
		ResCul_Time1D	ResCul_Time5D	154.298	11.7347	-3.71687
Phvul.009G120600.1	UDP-Glycosyltransferase superfamily protein	ResCul_Time0	ResCul_Time1D	3.88976	0	-inf
		ResCul_Time0	ResCul_Time5D	3.88976	1.9866	-0.969378
		ResCul_Time1D	ResCul_Time5D	0	1.9866	inf
Phvul.009G130600.1	Calcium-binding EF-hand family protein	ResCul_Time0	ResCul_Time1D	0	0	0
		ResCul_Time0	ResCul_Time5D	0	8.43018	inf
		ResCul_Time1D	ResCul_Time5D	0	8.43018	inf
Phvul.009G131900.1	wall-associated kinase 2	ResCul_Time0	ResCul_Time1D	0	0.115455	inf
		ResCul_Time0	ResCul_Time5D	0	3.27586	inf
		ResCul_Time1D	ResCul_Time5D	0.115455	3.27586	4.82647
Phvul.009G133500.1		ResCul_Time0	ResCul_Time1D	0	1.3754	inf
		ResCul_Time0	ResCul_Time5D	0	33.526	inf
		ResCul_Time1D	ResCul_Time5D	1.3754	33.526	4.60736
Phvul.009G171200.1	Leucine-rich repeat protein kinase family protein	ResCul_Time0	ResCul_Time1D	15.9208	29.0662	0.868424
		ResCul_Time0	ResCul_Time5D	15.9208	272.172	4.09553
		ResCul_Time1D	ResCul_Time5D	29.0662	272.172	3.2271
Phvul.009G180501.1	polygalacturonase inhibiting protein 1	ResCul_Time0	ResCul_Time1D	11.3644	313.236	4.78466
		ResCul_Time0	ResCul_Time5D	11.3644	31.3572	1.46428
		ResCul_Time1D	ResCul_Time5D	313.236	31.3572	-3.32038
Phvul.009G203400.1	AGAMOUS-like 8	ResCul_Time0	ResCul_Time1D	2.49023	0	-inf
		ResCul_Time0	ResCul_Time5D	2.49023	72.4317	4.86227
		ResCul_Time1D	ResCul_Time5D	0	72.4317	inf
Phvul.009G210332.1	flavin-dependent monooxygenase 1	ResCul_Time0	ResCul_Time1D	3.58749	15.891	2.14716
		ResCul_Time0	ResCul_Time5D	3.58749	0	-inf
		ResCul_Time1D	ResCul_Time5D	15.891	0	-inf
Phvul.009G225000.1	Integrase-type DNA-binding superfamily protein	ResCul_Time0	ResCul_Time1D	0	0.271183	inf
		ResCul_Time0	ResCul_Time5D	0	21.4833	inf
		ResCul_Time1D	ResCul_Time5D	0.271183	21.4833	6.30781
Phvul.009G227800.1	germin 3	ResCul_Time0	ResCul_Time1D	57.4386	1427.99	4.63582
		ResCul_Time0	ResCul_Time5D	57.4386	20.8393	-1.46271
		ResCul_Time1D	ResCul_Time5D	1427.99	20.8393	-6.09854
Phvul.009G236800.1	PA-domain containing subtilase family protein	ResCul_Time0	ResCul_Time1D	25.9161	64.6804	1.31948
		ResCul_Time0	ResCul_Time5D	25.9161	7.25331	-1.83714
		ResCul_Time1D	ResCul_Time5D	64.6804	7.25331	-3.15662
Phvul.009G240611.1	Plant protein of unknown function (DUF247)	ResCul_Time0	ResCul_Time1D	0	0.211467	inf
		ResCul_Time0	ResCul_Time5D	0	6.20351	inf
		ResCul_Time1D	ResCul_Time5D	0.211467	6.20351	4.87458
Phvul.009G240622.1	Ankyrin repeat family protein	ResCul_Time0	ResCul_Time1D	3.4561	14.848	2.10305
		ResCul_Time0	ResCul_Time5D	3.4561	64.7144	4.22687
		ResCul_Time1D	ResCul_Time5D	14.848	64.7144	2.12382
Phvul.009G250400.1	TOXICOS EN LEVADURA 2	ResCul_Time0	ResCul_Time1D	8.92682	17.096	0.937443
		ResCul_Time0	ResCul_Time5D	8.92682	152.263	4.09227
		ResCul_Time1D	ResCul_Time5D	17.096	152.263	3.15483
Phvul.009G256400.1	Glycosyl hydrolase superfamily protein	ResCul_Time0	ResCul_Time1D	2.15983	18.8621	3.1265
		ResCul_Time0	ResCul_Time5D	2.15983	959.196	8.79477
		ResCul_Time1D	ResCul_Time5D	18.8621	959.196	5.66827
Phvul.009G258500.1	photosystem I P subunit	ResCul_Time0	ResCul_Time1D	142.118	512.57	1.85066
		ResCul_Time0	ResCul_Time5D	142.118	46.6123	-1.60831
		ResCul_Time1D	ResCul_Time5D	512.57	46.6123	-3.45897
Phvul.009G259650.1	Homeodomain-like superfamily protein	ResCul_Time0	ResCul_Time1D	419.368	23.1692	-4.17794
		ResCul_Time0	ResCul_Time5D	419.368	341.269	-0.29731
		ResCul_Time1D	ResCul_Time5D	23.1692	341.269	3.88063
Phvul.010G012700.1	cytochrome P450, family 76, subfamily C, polypeptide 4	ResCul_Time0	ResCul_Time1D	0	0.932733	inf
		ResCul_Time0	ResCul_Time5D	0	33.2453	inf
		ResCul_Time1D	ResCul_Time5D	0.932733	33.2453	5.15554
Phvul.010G016000.1	rubisco activase	ResCul_Time0	ResCul_Time1D	330.331	6.7225	-5.61877
		ResCul_Time0	ResCul_Time5D	330.331	166.674	-0.986882
		ResCul_Time1D	ResCul_Time5D	6.7225	166.674	4.63189
Phvul.010G021700.1	vacuolar iron transporter (VIT) family protein	ResCul_Time0	ResCul_Time1D	0	9.23596	inf
		ResCul_Time0	ResCul_Time5D	0	11.4155	inf
		ResCul_Time1D	ResCul_Time5D	9.23596	11.4155	0.305661
Phvul.010G022700.1	cytochrome P450, family 82, subfamily G, polypeptide 1	ResCul_Time0	ResCul_Time1D	4.08437	2.67696	-0.609519
		ResCul_Time0	ResCul_Time5D	4.08437	177.844	5.44436
		ResCul_Time1D	ResCul_Time5D	2.67696	177.844	6.05388
Phvul.010G023300.1		ResCul_Time0	ResCul_Time1D	45.6589	0	-inf
		ResCul_Time0	ResCul_Time5D	45.6589	12.6556	-1.85112
		ResCul_Time1D	ResCul_Time5D	0	12.6556	inf
Phvul.010G023400.1		ResCul_Time0	ResCul_Time1D	66.8952	0	-inf
		ResCul_Time0	ResCul_Time5D	66.8952	22.4843	-1.57298
		ResCul_Time1D	ResCul_Time5D	0	22.4843	inf
Phvul.010G057900.1	WRKY DNA-binding protein 70	ResCul_Time0	ResCul_Time1D	0	0.166712	inf
		ResCul_Time0	ResCul_Time5D	0	7.67651	inf
		ResCul_Time1D	ResCul_Time5D	0.166712	7.67651	5.52502
Phvul.010G062900.1	methyltransferases	ResCul_Time0	ResCul_Time1D	5.2406	11.2935	1.10768
		ResCul_Time0	ResCul_Time5D	5.2406	122.872	4.55128
		ResCul_Time1D	ResCul_Time5D	11.2935	122.872	3.4436
Phvul.010G090000.1	BON association protein 1	ResCul_Time0	ResCul_Time1D	0	1.75233	inf
		ResCul_Time0	ResCul_Time5D	0	32.8078	inf
		ResCul_Time1D	ResCul_Time5D	1.75233	32.8078	4.22669
Phvul.010G091751.1		ResCul_Time0	ResCul_Time1D	10.0468	0	-inf
		ResCul_Time0	ResCul_Time5D	10.0468	8.813	-0.189036
		ResCul_Time1D	ResCul_Time5D	0	8.813	inf
Phvul.010G107400.1	BCL-2-associated athanogene 6	ResCul_Time0	ResCul_Time1D	162.357	8.87806	-4.19278
		ResCul_Time0	ResCul_Time5D	162.357	72.3071	-1.16696
		ResCul_Time1D	ResCul_Time5D	8.87806	72.3071	3.02582
Phvul.010G120200.1	O-methyltransferase 1	ResCul_Time0	ResCul_Time1D	0	0.461961	inf
		ResCul_Time0	ResCul_Time5D	0	10.3346	inf
		ResCul_Time1D	ResCul_Time5D	0.461961	10.3346	4.48357
Phvul.010G120300.1	2-oxoglutarate (2OG) and Fe(II)-dependent oxygenase superfamily protein	ResCul_Time0	ResCul_Time1D	0	8.53277	inf
		ResCul_Time0	ResCul_Time5D	0	13.9536	inf
		ResCul_Time1D	ResCul_Time5D	8.53277	13.9536	0.70955
Phvul.010G129900.1	germin-like protein 1	ResCul_Time0	ResCul_Time1D	103.697	1453.16	3.80875
		ResCul_Time0	ResCul_Time5D	103.697	14.4621	-2.84202
		ResCul_Time1D	ResCul_Time5D	1453.16	14.4621	-6.65077
Phvul.010G134000.1		ResCul_Time0	ResCul_Time1D	0	3.00417	inf
		ResCul_Time0	ResCul_Time5D	0	112.748	inf
		ResCul_Time1D	ResCul_Time5D	3.00417	112.748	5.23
Phvul.010G134700.1	lipoxygenase 1	ResCul_Time0	ResCul_Time1D	0	1.76884	inf
		ResCul_Time0	ResCul_Time5D	0	33.5799	inf
		ResCul_Time1D	ResCul_Time5D	1.76884	33.5799	4.24672
Phvul.010G134900.1	lipoxygenase 1	ResCul_Time0	ResCul_Time1D	8.0474	90.9326	3.4982
		ResCul_Time0	ResCul_Time5D	8.0474	9.63429	0.259657
		ResCul_Time1D	ResCul_Time5D	90.9326	9.63429	-3.23855
Phvul.010G135701.1	lipoxygenase 1	ResCul_Time0	ResCul_Time1D	0	7.40059	inf
		ResCul_Time0	ResCul_Time5D	0	0.106777	inf
		ResCul_Time1D	ResCul_Time5D	7.40059	0.106777	-6.11497
Phvul.010G156300.1	post-illumination chlorophyll fluorescence increase	ResCul_Time0	ResCul_Time1D	69.6905	521.304	2.90309
		ResCul_Time0	ResCul_Time5D	69.6905	23.1659	-1.58896
		ResCul_Time1D	ResCul_Time5D	521.304	23.1659	-4.49205
Phvul.010G162700.1	hydroxycinnamoyl-CoA shikimate/quinate hydroxycinnamoyl transferase	ResCul_Time0	ResCul_Time1D	13.9381	12.7002	-0.13418
		ResCul_Time0	ResCul_Time5D	13.9381	138.572	3.31353
		ResCul_Time1D	ResCul_Time5D	12.7002	138.572	3.44771
Phvul.011G002000.1	Major facilitator superfamily protein	ResCul_Time0	ResCul_Time1D	6.65804	74.7214	3.48835
		ResCul_Time0	ResCul_Time5D	6.65804	0.0751009	-6.47012
		ResCul_Time1D	ResCul_Time5D	74.7214	0.0751009	-9.95848
Phvul.011G005200.1	Plant invertase/pectin methylesterase inhibitor superfamily protein	ResCul_Time0	ResCul_Time1D	51.5763	11.8105	-2.12664
		ResCul_Time0	ResCul_Time5D	51.5763	265.014	2.36129
		ResCul_Time1D	ResCul_Time5D	11.8105	265.014	4.48793
Phvul.011G024700.1	NAC domain containing protein 36	ResCul_Time0	ResCul_Time1D	10.2105	34.4097	1.75276
		ResCul_Time0	ResCul_Time5D	10.2105	127.015	3.63688
		ResCul_Time1D	ResCul_Time5D	34.4097	127.015	1.88412
Phvul.011G049550.1	Ribosomal protein S5 domain 2-like superfamily protein	ResCul_Time0	ResCul_Time1D	0.691527	4.45573	2.6878
		ResCul_Time0	ResCul_Time5D	0.691527	0	-inf
		ResCul_Time1D	ResCul_Time5D	4.45573	0	-inf
Phvul.011G051600.1		ResCul_Time0	ResCul_Time1D	1.08175	0	-inf
		ResCul_Time0	ResCul_Time5D	1.08175	12.8824	3.57397
		ResCul_Time1D	ResCul_Time5D	0	12.8824	inf
Phvul.011G060300.1	UDP-glucosyl transferase 76E11	ResCul_Time0	ResCul_Time1D	0.576439	0	-inf
		ResCul_Time0	ResCul_Time5D	0.576439	10.889	4.23957
		ResCul_Time1D	ResCul_Time5D	0	10.889	inf
Phvul.011G062400.1	zinc finger (C3HC4-type RING finger) family protein	ResCul_Time0	ResCul_Time1D	6.39015	7.83827	0.294687
		ResCul_Time0	ResCul_Time5D	6.39015	187.628	4.87588
		ResCul_Time1D	ResCul_Time5D	7.83827	187.628	4.5812
Phvul.011G070700.1	pseudo-response regulator 3	ResCul_Time0	ResCul_Time1D	6.62567	0	-inf
		ResCul_Time0	ResCul_Time5D	6.62567	17.4742	1.39909
		ResCul_Time1D	ResCul_Time5D	0	17.4742	inf
Phvul.011G077900.1	Glycosyl hydrolase superfamily protein	ResCul_Time0	ResCul_Time1D	6.15445	45.9441	2.90018
		ResCul_Time0	ResCul_Time5D	6.15445	1282.6	7.70323
		ResCul_Time1D	ResCul_Time5D	45.9441	1282.6	4.80305
Phvul.011G097400.1	Polynucleotidyl transferase, ribonuclease H-like superfamily protein	ResCul_Time0	ResCul_Time1D	26.5187	68.9747	1.37906
		ResCul_Time0	ResCul_Time5D	26.5187	555.049	4.38753
		ResCul_Time1D	ResCul_Time5D	68.9747	555.049	3.00848
Phvul.011G100700.1		ResCul_Time0	ResCul_Time1D	0.859738	6.18326	2.8464
		ResCul_Time0	ResCul_Time5D	0.859738	0	-inf
		ResCul_Time1D	ResCul_Time5D	6.18326	0	-inf
Phvul.011G101500.1	cellulose synthase-like B3	ResCul_Time0	ResCul_Time1D	18.8153	2.1681	-3.1174
		ResCul_Time0	ResCul_Time5D	18.8153	47.245	1.32825
		ResCul_Time1D	ResCul_Time5D	2.1681	47.245	4.44566
Phvul.011G107000.1	xyloglucan endotransglucosylase/hydrolase 9	ResCul_Time0	ResCul_Time1D	49.1446	556.392	3.50099
		ResCul_Time0	ResCul_Time5D	49.1446	10.9098	-2.17141
		ResCul_Time1D	ResCul_Time5D	556.392	10.9098	-5.6724
Phvul.011G125200.1	erf domain protein 9	ResCul_Time0	ResCul_Time1D	10.9284	3.47041	-1.6549
		ResCul_Time0	ResCul_Time5D	10.9284	244.933	4.48623
		ResCul_Time1D	ResCul_Time5D	3.47041	244.933	6.14114
Phvul.011G132500.1		ResCul_Time0	ResCul_Time1D	0	0.235313	inf
		ResCul_Time0	ResCul_Time5D	0	23.5844	inf
		ResCul_Time1D	ResCul_Time5D	0.235313	23.5844	6.64711
Phvul.011G150950.1	S-locus lectin protein kinase family protein	ResCul_Time0	ResCul_Time1D	7.64458	0	-inf
		ResCul_Time0	ResCul_Time5D	7.64458	1.81523	-2.07429
		ResCul_Time1D	ResCul_Time5D	0	1.81523	inf
Phvul.011G176950.1	Glycosyl hydrolase superfamily protein	ResCul_Time0	ResCul_Time1D	1.61328	40.9828	4.66695
		ResCul_Time0	ResCul_Time5D	1.61328	577.61	8.48396
		ResCul_Time1D	ResCul_Time5D	40.9828	577.61	3.817
Phvul.011G182300.1	Leucine-rich repeat receptor-like protein kinase family protein	ResCul_Time0	ResCul_Time1D	0.608293	0	-inf
		ResCul_Time0	ResCul_Time5D	0.608293	24.7806	5.3483
		ResCul_Time1D	ResCul_Time5D	0	24.7806	inf
Phvul.011G183832.1	MLP-like protein 43	ResCul_Time0	ResCul_Time1D	67.8281	0	-inf
		ResCul_Time0	ResCul_Time5D	67.8281	34.7475	-0.964975
		ResCul_Time1D	ResCul_Time5D	0	34.7475	inf
Phvul.011G203450.1	sigma factor binding protein 1	ResCul_Time0	ResCul_Time1D	0	7.31934	inf
		ResCul_Time0	ResCul_Time5D	0	40.4362	inf
		ResCul_Time1D	ResCul_Time5D	7.31934	40.4362	2.46586
Phvul.L001678.1	phosphoenolpyruvate carboxylase kinase 2	ResCul_Time0	ResCul_Time1D	1.28387	0	-inf
		ResCul_Time0	ResCul_Time5D	1.28387	4.4176	1.78276
		ResCul_Time1D	ResCul_Time5D	0	4.4176	inf
Phvul.L008700.2	ribonuclease P family protein / Rpp14 family protein	ResCul_Time0	ResCul_Time1D	0.938794	4.09309	2.12431
		ResCul_Time0	ResCul_Time5D	0.938794	0	-inf
		ResCul_Time1D	ResCul_Time5D	4.09309	0	-inf
